# Supplementary material for: The selective NLRP3 inhibitor MCC950 hinders atherosclerosis development by attenuating inflammation and pyroptosis in macrophages
Source: PubMed Central journal article supplement (PMC8481539; doi:10.1038/s41598-021-98437-3), 2021-09-29

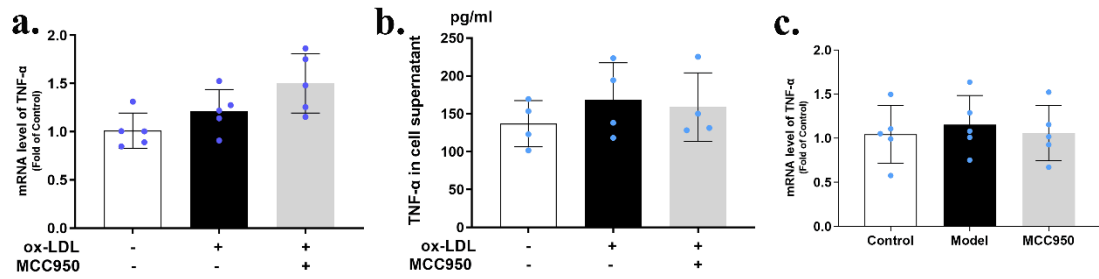

Supplementary Figure I. MCC950 exposure did not affect TNF- $\alpha$  transcription (a, n=5/group) and secretion (b, n=4/group) by THP-1 macrophages upon stimulation with ox-LDL. Also in vivo, MCC950 treatment did not affect mRNA level of TNF- $\alpha$  in the aortas of apoE<sup>-/-</sup> mice with high-fat diet (c, n=5/group).

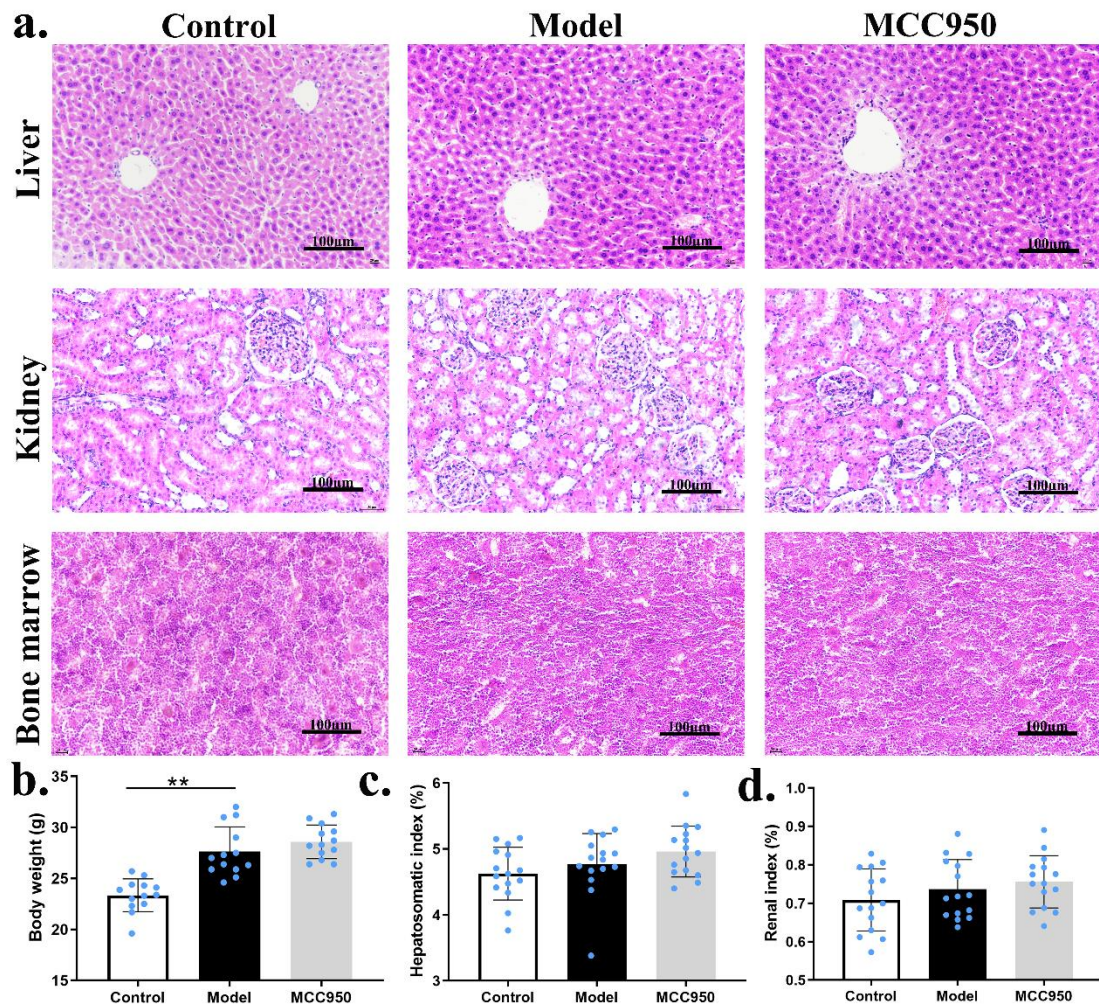

Supplementary Figure II. MCC950 treatment did not affect the body weight, hepatosomatic index and renal index of apoE<sup>-/-</sup> mice fed with western diets for 12 weeks (b~d, n=13). MCC950 showed a nontoxic effect on the liver, kidney and bone marrow

of apoE<sup>-/-</sup> mice. \**P*<0.05 was considered significant, \*\**P*<0.01.

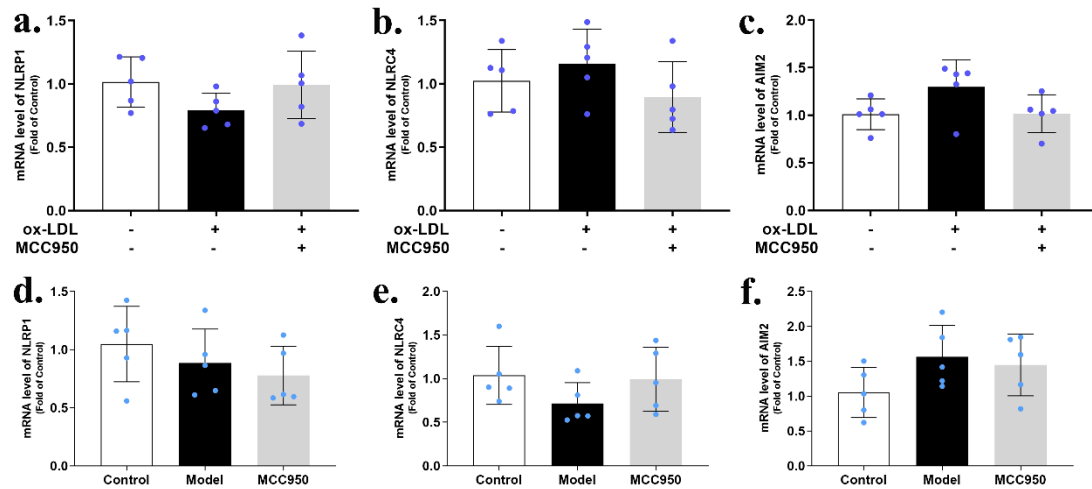

Supplementary Figure III. MCC950 treatment did not affect the mRNA levels of NLRP1 (a, d), NLRC4 (b, e) and AIM2 (c, f) in the aortas of apoE<sup>-/-</sup> mice with high-fat diet and in ox-LDL induced THP-1 macrophages. N=5/group.

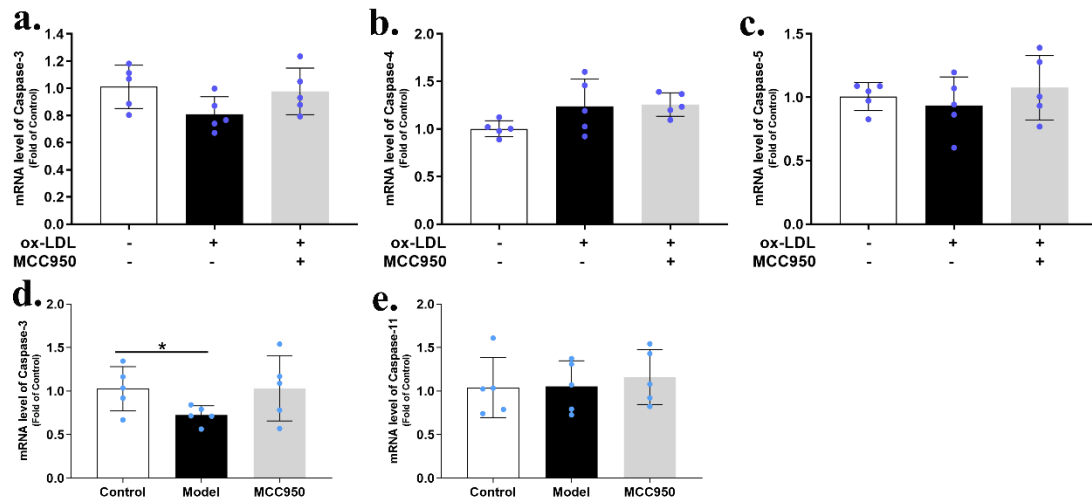

Supplementary Figure IV. MCC950 exposure did not affect the mRNA levels of Caspase-3 (a, d), Caspase-4 (also named Caspase-11 in mice; a, d) and Caspase-5 (c) in the aortas of apoE<sup>-/-</sup> mice with high-fat diet and in ox-LDL induced THP-1 macrophages. N=5/group, \**P*<0.05 was considered significant.

Supplementary Table I. Primer sequences for *Mus musculus* gene expansion.

| Name          | Primer sequence                                                           | Products | Gene ID |
|---------------|---------------------------------------------------------------------------|----------|---------|
| AIM2          | Forward: TCGTGATGAAATCCACCCTCA<br>Reverse: CTGTCTTGTTCCCACTGCCT           | 218bp    | 383619  |
| Caspase-3     | Forward: GGCTGACTTCCTGTATGCTTACTCTAC<br>Reverse: ATGCTGCAAAGGGACTGGATGAAC | 96bp     | 12367   |
| Caspase-11    | Forward: TGACAAGCGTTGGGTTTTTGT<br>Reverse: CTGACTCCATGCCCTTCACCAT         | 123bp    | 12363   |
| NLRP1         | Forward: CTGCGGCAGTACCAATGAAG<br>Reverse: GCCTTTTGAGCATCTCGCAT            | 145bp    | 195046  |
| NLRC4         | Forward: TGCTGGAAGTCCTCTGGGAT<br>Reverse: GGGCTCGGCTATTGTCCTTT            | 174bp    | 268973  |
| TNF- $\alpha$ | Forward: ATGAGAAGTCCCAAATGGC<br>Reverse: CTCCACTTGGTGGTTTGCTA             | 125bp    | 21926   |

Supplementary Table II. Primer sequences for *Homan sapiens* gene expansion.

| Name          | Primer sequence                                                      | Products | Gene ID |
|---------------|----------------------------------------------------------------------|----------|---------|
| AIM2          | Forward: TAGGTTATTTGGGCATGCTCTC<br>Reverse: ACAACTTTGGGATCAGCCTCC    | 115bp    | 9447    |
| Caspase-3     | Forward: ATTTGGAAACCAAAGATCATACATGG<br>Reverse: TTCCCTGAGGTTTGCTGCAT | 185bp    | 836     |
| Caspase-4     | Forward: ACAAGACCCACGTGGAGAAG<br>Reverse: ACTTCCTCTAGGTGGCAGCA       | 151bp    | 837     |
| Caspase-5     | Forward: CACAGCCAGGGATATGGAGT<br>Reverse: GCCTGGACAATGATGACCTT       | 234bp    | 838     |
| NLRP1         | Forward: GGAGATCTCATGCCTGCAACT<br>Reverse: CCAAGACAACCTCCACCGAT      | 145bp    | 22861   |
| NLRC4         | Forward: TGCTGGAAGTCCTCTGGGAT<br>Reverse: GGGCTCGGCTATTGTCCTTT       | 174bp    | 58484   |
| TNF- $\alpha$ | Forward: AGAACTCACTGGGGCCTACA<br>Reverse: GCTCCGTGTCTCAAGGAAGT       | 177bp    | 7124    |

| mRNA level of TLR4 in aortas      |        |           |        |             |                  |                   |                        |       |        |                   |
|-----------------------------------|--------|-----------|--------|-------------|------------------|-------------------|------------------------|-------|--------|-------------------|
|                                   |        | TLR4      | GAPDH  |             |                  |                   |                        |       |        |                   |
| Group                             | number | CT        | CT     | $\Delta$ CT | $\Delta$ CT Mean | $\Delta\Delta$ CT | $2^{-\Delta\Delta CT}$ | Mean  | SD     | Compared to Model |
| Control                           | C1     | 26.414    | 17.12  | 9.294       | 9.2668           | 0.0272            | 0.9813                 | 1.026 | 0.2525 | 0.011536231       |
|                                   | C2     | 30.264    | 20.444 | 9.82        |                  | 0.5532            | 0.6815                 |       |        |                   |
|                                   | C3     | 27.185    | 17.937 | 9.248       |                  | -0.0188           | 1.0131                 |       |        |                   |
|                                   | C4     | 24.839    | 15.658 | 9.181       |                  | -0.0858           | 1.0613                 |       |        |                   |
|                                   | C5     | 27.684    | 18.893 | 8.791       |                  | -0.4758           | 1.3907                 |       |        |                   |
| Model                             | M1     | 25.277    | 16.615 | 8.662       |                  | -0.6048           | 1.5208                 | 2.098 | 0.6913 |                   |
|                                   | M2     | 27.409    | 18.745 | 8.664       |                  | -0.6028           | 1.5187                 |       |        |                   |
|                                   | M3     | 26.708    | 18.906 | 7.802       |                  | -1.4648           | 2.7603                 |       |        |                   |
|                                   | M4     | 25.228    | 17.512 | 7.716       |                  | -1.5508           | 2.9298                 |       |        |                   |
|                                   | M5     | 23.842    | 15.393 | 8.449       |                  | -0.8178           | 1.7627                 |       |        |                   |
| MCC950                            | MC1    | 25.314    | 16.681 | 8.633       |                  | -0.6338           | 1.5516                 | 1.844 | 0.8758 | 0.623267759       |
|                                   | MC2    | 27.211    | 18.379 | 8.832       |                  | -0.4348           | 1.3517                 |       |        |                   |
|                                   | MC3    | 27.148    | 19.648 | 7.5         |                  | -1.7668           | 3.403                  |       |        |                   |
|                                   | MC4    | 28.423    | 19.633 | 8.79        |                  | -0.4768           | 1.3917                 |       |        |                   |
|                                   | MC5    | 26.514    | 17.851 | 8.663       |                  | -0.6038           | 1.5197                 |       |        |                   |
| mRNA level of NLRP3 in aortas     |        |           |        |             |                  |                   |                        |       |        |                   |
|                                   |        | NLRP3     | GAPDH  |             |                  |                   |                        |       |        |                   |
| Group                             | number | CT        | CT     | $\Delta$ CT | $\Delta$ CT Mean | $\Delta\Delta$ CT | $2^{-\Delta\Delta CT}$ | Mean  | SD     | Compared to Model |
| Control                           | C1     | 31.969    | 17.12  | 14.849      | 14.6984          | 0.1506            | 0.9009                 | 1.003 | 0.0869 | 0.00200095        |
|                                   | C2     | 34.981    | 20.444 | 14.537      |                  | -0.1614           | 1.1184                 |       |        |                   |
|                                   | C3     | 32.702    | 17.937 | 14.765      |                  | 0.0666            | 0.9549                 |       |        |                   |
|                                   | C4     | 30.269    | 15.658 | 14.611      |                  | -0.0874           | 1.0625                 |       |        |                   |
|                                   | C5     | 33.623    | 18.893 | 14.73       |                  | 0.0316            | 0.9783                 |       |        |                   |
| Model                             | M1     | 30.272    | 16.615 | 13.657      |                  | -1.0414           | 2.0582                 | 3.649 | 1.3117 |                   |
|                                   | M2     | 31.74     | 18.745 | 12.995      |                  | -1.7034           | 3.2567                 |       |        |                   |
|                                   | M3     | 31.207    | 18.906 | 12.301      |                  | -2.3974           | 5.2685                 |       |        |                   |
|                                   | M4     | 29.978    | 17.512 | 12.466      |                  | -2.2324           | 4.6992                 |       |        |                   |
|                                   | M5     | 28.525    | 15.393 | 13.132      |                  | -1.5664           | 2.9616                 |       |        |                   |
| MCC950                            | MC1    | 29.668    | 16.681 | 12.987      |                  | -1.7114           | 3.2748                 | 3.808 | 1.387  | 0.856668074       |
|                                   | MC2    | 31.593    | 18.379 | 13.214      |                  | -1.4844           | 2.798                  |       |        |                   |
|                                   | MC3    | 31.84     | 19.648 | 12.192      |                  | -2.5064           | 5.682                  |       |        |                   |
|                                   | MC4    | 32.059    | 19.633 | 12.426      |                  | -2.2724           | 4.8313                 |       |        |                   |
|                                   | MC5    | 31.254    | 17.851 | 13.403      |                  | -1.2954           | 2.4545                 |       |        |                   |
| mRNA level of Caspase-1 in aortas |        |           |        |             |                  |                   |                        |       |        |                   |
|                                   |        | Caspase-1 | GAPDH  |             |                  |                   |                        |       |        |                   |
| Group                             | number | CT        | CT     | $\Delta$ CT | $\Delta$ CT Mean | $\Delta\Delta$ CT | $2^{-\Delta\Delta CT}$ | Mean  | SD     | Compared to Model |
| Control                           | C1     | 26.805    | 17.12  | 9.685       | 9.1252           | 0.5598            | 0.6784                 | 1.085 | 0.5315 | 0.018340287       |
|                                   | C2     | 29.645    | 20.444 | 9.201       |                  | 0.0758            | 0.9488                 |       |        |                   |
|                                   | C3     | 26.92     | 17.937 | 8.983       |                  | -0.1422           | 1.1036                 |       |        |                   |
|                                   | C4     | 25.277    | 15.658 | 9.619       |                  | 0.4938            | 0.7102                 |       |        |                   |
|                                   | C5     | 27.031    | 18.893 | 8.138       |                  | -0.9872           | 1.9823                 |       |        |                   |
| Model                             | M1     | 24.671    | 16.615 | 8.056       |                  | -1.0692           | 2.0983                 | 2.246 | 0.7009 |                   |
|                                   | M2     | 26.156    | 18.745 | 7.411       |                  | -1.7142           | 3.2811                 |       |        |                   |
|                                   | M3     | 26.987    | 18.906 | 8.081       |                  | -1.0442           | 2.0622                 |       |        |                   |
|                                   | M4     | 26.203    | 17.512 | 8.691       |                  | -0.4342           | 1.3512                 |       |        |                   |
|                                   | M5     | 23.232    | 15.393 | 7.839       |                  | -1.2862           | 2.4388                 |       |        |                   |
| MCC950                            | MC1    | 24.608    | 16.681 | 7.927       |                  | -1.1982           | 2.2945                 | 1.361 | 0.6126 | 0.066192176       |
|                                   | MC2    | 27.937    | 18.379 | 9.558       |                  | 0.4328            | 0.7408                 |       |        |                   |
|                                   | MC3    | 28.891    | 19.648 | 9.243       |                  | 0.1178            | 0.9216                 |       |        |                   |
|                                   | MC4    | 28.105    | 19.633 | 8.472       |                  | -0.6532           | 1.5727                 |       |        |                   |
|                                   | MC5    | 26.624    | 17.851 | 8.773       |                  | -0.3522           | 1.2765                 |       |        |                   |

| mRNA level of IL-1 $\beta$ in aortas |        |              |        |             |                  |                   |                        |       |        |                   |
|--------------------------------------|--------|--------------|--------|-------------|------------------|-------------------|------------------------|-------|--------|-------------------|
|                                      |        | IL-1 $\beta$ | GAPDH  |             |                  |                   |                        |       |        |                   |
| Group                                | number | CT           | CT     | $\Delta$ CT | $\Delta$ CT Mean | $\Delta\Delta$ CT | $2^{-\Delta\Delta CT}$ | Mean  | SD     | Compared to Model |
| Control                              | C1     | 30.018       | 17.12  | 12.898      | 12.401           | 0.497             | 0.7086                 | 1.042 | 0.3257 | 0.026586322       |
|                                      | C2     | 32.343       | 20.444 | 11.899      |                  | -0.502            | 1.4162                 |       |        |                   |
|                                      | C3     | 30.253       | 17.937 | 12.316      |                  | -0.085            | 1.0607                 |       |        |                   |
|                                      | C4     | 27.675       | 15.658 | 12.017      |                  | -0.384            | 1.305                  |       |        |                   |
|                                      | C5     | 31.768       | 18.893 | 12.875      |                  | 0.474             | 0.72                   |       |        |                   |
| Model                                | M1     | 27.617       | 16.615 | 11.002      |                  | -1.399            | 2.6372                 | 3.926 | 2.3558 |                   |
|                                      | M2     | 29.489       | 18.745 | 10.744      |                  | -1.657            | 3.1536                 |       |        |                   |
|                                      | M3     | 30.63        | 18.906 | 11.724      |                  | -0.677            | 1.5988                 |       |        |                   |
|                                      | M4     | 27.725       | 17.512 | 10.213      |                  | -2.188            | 4.5567                 |       |        |                   |
|                                      | M5     | 24.852       | 15.393 | 9.459       |                  | -2.942            | 7.6848                 |       |        |                   |
| MCC950                               | MC1    | 27.039       | 16.681 | 10.358      |                  | -2.043            | 4.121                  | 3.76  | 0.3722 | 0.880304777       |
|                                      | MC2    | 28.828       | 18.379 | 10.449      |                  | -1.952            | 3.8691                 |       |        |                   |
|                                      | MC3    | 30.09        | 19.648 | 10.442      |                  | -1.959            | 3.8879                 |       |        |                   |
|                                      | MC4    | 30.111       | 19.633 | 10.478      |                  | -1.923            | 3.7921                 |       |        |                   |
|                                      | MC5    | 28.605       | 17.851 | 10.754      |                  | -1.647            | 3.1318                 |       |        |                   |
| mRNA level of IL-18 in aortas        |        |              |        |             |                  |                   |                        |       |        |                   |
|                                      |        | IL-18        | GAPDH  |             |                  |                   |                        |       |        |                   |
| Group                                | number | CT           | CT     | $\Delta$ CT | $\Delta$ CT Mean | $\Delta\Delta$ CT | $2^{-\Delta\Delta CT}$ | Mean  | SD     | Compared to Model |
| Control                              | C1     | 29.158       | 17.12  | 12.038      | 11.1586          | 0.8794            | 0.5436                 | 1.059 | 0.3712 | 0.356720243       |
|                                      | C2     | 31.138       | 20.444 | 10.694      |                  | -0.4646           | 1.3799                 |       |        |                   |
|                                      | C3     | 29.133       | 17.937 | 11.196      |                  | 0.0374            | 0.9744                 |       |        |                   |
|                                      | C4     | 26.91        | 15.658 | 11.252      |                  | 0.0934            | 0.9373                 |       |        |                   |
|                                      | C5     | 29.506       | 18.893 | 10.613      |                  | -0.5456           | 1.4596                 |       |        |                   |
| Model                                | M1     | 27.386       | 16.615 | 10.771      |                  | -0.3876           | 1.3082                 | 1.238 | 0.1744 |                   |
|                                      | M2     | 29.326       | 18.745 | 10.581      |                  | -0.5776           | 1.4924                 |       |        |                   |
|                                      | M3     | 29.765       | 18.906 | 10.859      |                  | -0.2996           | 1.2308                 |       |        |                   |
|                                      | M4     | 28.604       | 17.512 | 11.092      |                  | -0.0666           | 1.0472                 |       |        |                   |
|                                      | M5     | 26.397       | 15.393 | 11.004      |                  | -0.1546           | 1.1131                 |       |        |                   |
| MCC950                               | MC1    | 27.455       | 16.681 | 10.774      |                  | -0.3846           | 1.3055                 | 0.934 | 0.3054 | 0.088820744       |
|                                      | MC2    | 29.856       | 18.379 | 11.477      |                  | 0.3184            | 0.802                  |       |        |                   |
|                                      | MC3    | 30.527       | 19.648 | 10.879      |                  | -0.2796           | 1.2139                 |       |        |                   |
|                                      | MC4    | 31.27        | 19.633 | 11.637      |                  | 0.4784            | 0.7178                 |       |        |                   |
|                                      | MC5    | 29.677       | 17.851 | 11.826      |                  | 0.6674            | 0.6296                 |       |        |                   |
| mRNA level of GSDMD in aortas        |        |              |        |             |                  |                   |                        |       |        |                   |
|                                      |        | GSDMD        | GAPDH  |             |                  |                   |                        |       |        |                   |
| Group                                | number | CT           | CT     | $\Delta$ CT | $\Delta$ CT Mean | $\Delta\Delta$ CT | $2^{-\Delta\Delta CT}$ | Mean  | SD     | Compared to Model |
| Control                              | C1     | 28.921       | 17.12  | 11.801      | 11.2256          | 0.5754            | 0.6711                 | 1.049 | 0.3739 | 0.594691014       |
|                                      | C2     | 30.956       | 20.444 | 10.512      |                  | -0.7136           | 1.6399                 |       |        |                   |
|                                      | C3     | 29.003       | 17.937 | 11.066      |                  | -0.1596           | 1.117                  |       |        |                   |
|                                      | C4     | 27.204       | 15.658 | 11.546      |                  | 0.3204            | 0.8008                 |       |        |                   |
|                                      | C5     | 30.096       | 18.893 | 11.203      |                  | -0.0226           | 1.0158                 |       |        |                   |
| Model                                | M1     | 28.479       | 16.615 | 11.864      |                  | 0.6384            | 0.6424                 | 0.922 | 0.3478 |                   |
|                                      | M2     | 29.475       | 18.745 | 10.73       |                  | -0.4956           | 1.4099                 |       |        |                   |
|                                      | M3     | 30.366       | 18.906 | 11.46       |                  | 0.2344            | 0.85                   |       |        |                   |
|                                      | M4     | 28.559       | 17.512 | 11.047      |                  | -0.1786           | 1.1318                 |       |        |                   |
|                                      | M5     | 27.41        | 15.393 | 12.017      |                  | 0.7914            | 0.5778                 |       |        |                   |
| MCC950                               | MC1    | 27.13        | 16.681 | 10.449      |                  | -0.7766           | 1.7131                 | 1.205 | 0.3715 | 0.249179745       |
|                                      | MC2    | 29.461       | 18.379 | 11.082      |                  | -0.1436           | 1.1047                 |       |        |                   |
|                                      | MC3    | 31.087       | 19.648 | 11.439      |                  | 0.2134            | 0.8625                 |       |        |                   |
|                                      | MC4    | 30.313       | 19.633 | 10.68       |                  | -0.5456           | 1.4596                 |       |        |                   |
|                                      | MC5    | 29.251       | 17.851 | 11.4        |                  | 0.1744            | 0.8861                 |       |        |                   |

| mRNA level of TNF- $\alpha$ in aortas |        |                  |          |             |                  |                   |                        |       |        |                   |
|---------------------------------------|--------|------------------|----------|-------------|------------------|-------------------|------------------------|-------|--------|-------------------|
| Group                                 | number | TNF- $\alpha$ CT | GAPDH CT | $\Delta$ CT | $\Delta$ CT Mean | $\Delta\Delta$ CT | $2^{-\Delta\Delta CT}$ | Mean  | SD     | Compared to Model |
| Control                               | C1     | 29.28            | 17.12    | 12.16       | 12.149           | 0.011             | 0.9924                 | 1.045 | 0.328  | 0.620000045       |
|                                       | C2     | 32.01            | 20.444   | 11.566      |                  | -0.583            | 1.498                  |       |        |                   |
|                                       | C3     | 30.012           | 17.937   | 12.075      |                  | -0.074            | 1.0526                 |       |        |                   |
|                                       | C4     | 28.599           | 15.658   | 12.941      |                  | 0.792             | 0.5775                 |       |        |                   |
|                                       | C5     | 30.896           | 18.893   | 12.003      |                  | -0.146            | 1.1065                 |       |        |                   |
| Model                                 | M1     | 28.054           | 16.615   | 11.439      |                  | -0.71             | 1.6358                 | 1.153 | 0.3313 |                   |
|                                       | M2     | 31.307           | 18.745   | 12.562      |                  | 0.413             | 0.7511                 |       |        |                   |
|                                       | M3     | 30.689           | 18.906   | 11.783      |                  | -0.366            | 1.2888                 |       |        |                   |
|                                       | M4     | 29.648           | 17.512   | 12.136      |                  | -0.013            | 1.0091                 |       |        |                   |
|                                       | M5     | 27.431           | 15.393   | 12.038      |                  | -0.111            | 1.08                   |       |        |                   |
| MCC950                                | MC1    | 28.94            | 16.681   | 12.259      |                  | 0.11              | 0.9266                 | 1.058 | 0.314  | 0.654804412       |
|                                       | MC2    | 31.104           | 18.379   | 12.725      |                  | 0.576             | 0.6708                 |       |        |                   |
|                                       | MC3    | 31.591           | 19.648   | 11.943      |                  | -0.206            | 1.1535                 |       |        |                   |
|                                       | MC4    | 31.175           | 19.633   | 11.542      |                  | -0.607            | 1.5231                 |       |        |                   |
|                                       | MC5    | 29.976           | 17.851   | 12.125      |                  | -0.024            | 1.0168                 |       |        |                   |
| mRNA level of Caspase-3 in aortas     |        |                  |          |             |                  |                   |                        |       |        |                   |
| Group                                 | number | Caspase-3 CT     | GAPDH CT | $\Delta$ CT | $\Delta$ CT Mean | $\Delta\Delta$ CT | $2^{-\Delta\Delta CT}$ | Mean  | SD     | Compared to Model |
| Control                               | C1     | 27.194           | 17.12    | 10.074      | 9.954            | 0.12              | 0.9202                 | 1.027 | 0.255  | 0.039932916       |
|                                       | C2     | 30.347           | 20.444   | 9.903       |                  | -0.051            | 1.036                  |       |        |                   |
|                                       | C3     | 28.47            | 17.937   | 10.533      |                  | 0.579             | 0.6694                 |       |        |                   |
|                                       | C4     | 25.393           | 15.658   | 9.735       |                  | -0.219            | 1.1639                 |       |        |                   |
|                                       | C5     | 28.418           | 18.893   | 9.525       |                  | -0.429            | 1.3463                 |       |        |                   |
| Model                                 | M1     | 27.051           | 16.615   | 10.436      |                  | 0.482             | 0.716                  | 0.725 | 0.1052 |                   |
|                                       | M2     | 28.947           | 18.745   | 10.202      |                  | 0.248             | 0.8421                 |       |        |                   |
|                                       | M3     | 29.686           | 18.906   | 10.78       |                  | 0.826             | 0.5641                 |       |        |                   |
|                                       | M4     | 27.957           | 17.512   | 10.445      |                  | 0.491             | 0.7115                 |       |        |                   |
|                                       | M5     | 25.685           | 15.393   | 10.292      |                  | 0.338             | 0.7911                 |       |        |                   |
| MCC950                                | MC1    | 26.41            | 16.681   | 9.729       |                  | -0.225            | 1.1688                 | 1.03  | 0.3729 | 0.11626482        |
|                                       | MC2    | 27.71            | 18.379   | 9.331       |                  | -0.623            | 1.5401                 |       |        |                   |
|                                       | MC3    | 29.958           | 19.648   | 10.31       |                  | 0.356             | 0.7813                 |       |        |                   |
|                                       | MC4    | 29.463           | 19.633   | 9.83        |                  | -0.124            | 1.0898                 |       |        |                   |
|                                       | MC5    | 28.615           | 17.851   | 10.764      |                  | 0.81              | 0.5704                 |       |        |                   |
| mRNA level of Caspase-11 in aortas    |        |                  |          |             |                  |                   |                        |       |        |                   |
| Group                                 | number | Caspase11 CT     | GAPDH CT | $\Delta$ CT | $\Delta$ CT Mean | $\Delta\Delta$ CT | $2^{-\Delta\Delta CT}$ | Mean  | SD     | Compared to Model |
| Control                               | C1     | 26.684           | 17.12    | 9.564       | 9.6116           | -0.0476           | 1.0335                 | 1.04  | 0.3449 | 0.942141407       |
|                                       | C2     | 30.397           | 20.444   | 9.953       |                  | 0.3414            | 0.7893                 |       |        |                   |
|                                       | C3     | 27.512           | 17.937   | 9.575       |                  | -0.0366           | 1.0257                 |       |        |                   |
|                                       | C4     | 25.699           | 15.658   | 10.041      |                  | 0.4294            | 0.7426                 |       |        |                   |
|                                       | C5     | 27.818           | 18.893   | 8.925       |                  | -0.6866           | 1.6095                 |       |        |                   |
| Model                                 | M1     | 25.836           | 16.615   | 9.221       |                  | -0.3906           | 1.3109                 | 1.055 | 0.293  |                   |
|                                       | M2     | 28.818           | 18.745   | 10.073      |                  | 0.4614            | 0.7263                 |       |        |                   |
|                                       | M3     | 28.417           | 18.906   | 9.511       |                  | -0.1006           | 1.0722                 |       |        |                   |
|                                       | M4     | 27.457           | 17.512   | 9.945       |                  | 0.3334            | 0.7937                 |       |        |                   |
|                                       | M5     | 24.547           | 15.393   | 9.154       |                  | -0.4576           | 1.3733                 |       |        |                   |
| MCC950                                | MC1    | 26.181           | 16.681   | 9.5         |                  | -0.1116           | 1.0804                 | 1.16  | 0.3151 | 0.599948163       |
|                                       | MC2    | 28.108           | 18.379   | 9.729       |                  | 0.1174            | 0.9218                 |       |        |                   |
|                                       | MC3    | 28.633           | 19.648   | 8.985       |                  | -0.6266           | 1.5439                 |       |        |                   |
|                                       | MC4    | 28.727           | 19.633   | 9.094       |                  | -0.5176           | 1.4316                 |       |        |                   |
|                                       | MC5    | 27.742           | 17.851   | 9.891       |                  | 0.2794            | 0.8239                 |       |        |                   |

| mRNA level of NLRP1 in aortas |        |        |        |             |                  |                   |                        |       |        |                   |
|-------------------------------|--------|--------|--------|-------------|------------------|-------------------|------------------------|-------|--------|-------------------|
|                               |        | NLRP1  | GAPDH  |             |                  |                   |                        |       |        |                   |
| Group                         | number | CT     | CT     | $\Delta$ CT | $\Delta$ CT Mean | $\Delta\Delta$ CT | $2^{-\Delta\Delta CT}$ | Mean  | SD     | Compared to Model |
| Control                       | C1     | 28.76  | 17.12  | 11.64       | 10.8004          | 0.8396            | 0.5588                 | 1.048 | 0.3248 | 0.426513503       |
|                               | C2     | 31.024 | 20.444 | 10.58       |                  | -0.2204           | 1.1651                 |       |        |                   |
|                               | C3     | 28.843 | 17.937 | 10.906      |                  | 0.1056            | 0.9294                 |       |        |                   |
|                               | C4     | 26.245 | 15.658 | 10.587      |                  | -0.2134           | 1.1594                 |       |        |                   |
|                               | C5     | 29.182 | 18.893 | 10.289      |                  | -0.5114           | 1.4254                 |       |        |                   |
| Model                         | M1     | 26.995 | 16.615 | 10.38       |                  | -0.4204           | 1.3383                 | 0.884 | 0.2928 |                   |
|                               | M2     | 30.258 | 18.745 | 11.513      |                  | 0.7126            | 0.6102                 |       |        |                   |
|                               | M3     | 30.332 | 18.906 | 11.426      |                  | 0.6256            | 0.6482                 |       |        |                   |
|                               | M4     | 28.374 | 17.512 | 10.862      |                  | 0.0616            | 0.9582                 |       |        |                   |
|                               | M5     | 26.404 | 15.393 | 11.011      |                  | 0.2106            | 0.8642                 |       |        |                   |
| MCC950                        | MC1    | 27.525 | 16.681 | 10.844      |                  | 0.0436            | 0.9702                 | 0.778 | 0.2524 | 0.558207752       |
|                               | MC2    | 29.926 | 18.379 | 11.547      |                  | 0.7466            | 0.596                  |       |        |                   |
|                               | MC3    | 31.151 | 19.648 | 11.503      |                  | 0.7026            | 0.6145                 |       |        |                   |
|                               | MC4    | 31.207 | 19.633 | 11.574      |                  | 0.7736            | 0.585                  |       |        |                   |
|                               | MC5    | 28.481 | 17.851 | 10.63       |                  | -0.1704           | 1.1254                 |       |        |                   |
| mRNA level of NLRC4 in aortas |        |        |        |             |                  |                   |                        |       |        |                   |
|                               |        | NLRC4  | GAPDH  |             |                  |                   |                        |       |        |                   |
| Group                         | number | CT     | CT     | $\Delta$ CT | $\Delta$ CT Mean | $\Delta\Delta$ CT | $2^{-\Delta\Delta CT}$ | Mean  | SD     | Compared to Model |
| Control                       | C1     | 26.372 | 17.12  | 9.252       | 9.1024           | 0.1496            | 0.9015                 | 1.037 | 0.3335 | 0.116651412       |
|                               | C2     | 28.869 | 20.444 | 8.425       |                  | -0.6774           | 1.5993                 |       |        |                   |
|                               | C3     | 27.475 | 17.937 | 9.538       |                  | 0.4356            | 0.7394                 |       |        |                   |
|                               | C4     | 24.928 | 15.658 | 9.27        |                  | 0.1676            | 0.8903                 |       |        |                   |
|                               | C5     | 27.92  | 18.893 | 9.027       |                  | -0.0754           | 1.0537                 |       |        |                   |
| Model                         | M1     | 26.523 | 16.615 | 9.908       |                  | 0.8056            | 0.5721                 | 0.715 | 0.2377 |                   |
|                               | M2     | 27.723 | 18.745 | 8.978       |                  | -0.1244           | 1.0901                 |       |        |                   |
|                               | M3     | 28.937 | 18.906 | 10.031      |                  | 0.9286            | 0.5254                 |       |        |                   |
|                               | M4     | 26.916 | 17.512 | 9.404       |                  | 0.3016            | 0.8114                 |       |        |                   |
|                               | M5     | 25.295 | 15.393 | 9.902       |                  | 0.7996            | 0.5745                 |       |        |                   |
| MCC950                        | MC1    | 25.854 | 16.681 | 9.173       |                  | 0.0706            | 0.9522                 | 0.993 | 0.3683 | 0.193728481       |
|                               | MC2    | 28.244 | 18.379 | 9.865       |                  | 0.7626            | 0.5894                 |       |        |                   |
|                               | MC3    | 28.381 | 19.648 | 8.733       |                  | -0.3694           | 1.2918                 |       |        |                   |
|                               | MC4    | 29.266 | 19.633 | 9.633       |                  | 0.5306            | 0.6923                 |       |        |                   |
|                               | MC5    | 26.429 | 17.851 | 8.578       |                  | -0.5244           | 1.4383                 |       |        |                   |
| mRNA level of AIM2 in aortas  |        |        |        |             |                  |                   |                        |       |        |                   |
|                               |        | AIM2   | GAPDH  |             |                  |                   |                        |       |        |                   |
| Group                         | number | CT     | CT     | $\Delta$ CT | $\Delta$ CT Mean | $\Delta\Delta$ CT | $2^{-\Delta\Delta CT}$ | Mean  | SD     | Compared to Model |
| Control                       | C1     | 25.938 | 17.12  | 8.818       | 9.4044           | -0.5864           | 1.5015                 | 1.051 | 0.3588 | 0.081256245       |
|                               | C2     | 29.468 | 20.444 | 9.024       |                  | -0.3804           | 1.3017                 |       |        |                   |
|                               | C3     | 27.296 | 17.937 | 9.359       |                  | -0.0454           | 1.032                  |       |        |                   |
|                               | C4     | 25.751 | 15.658 | 10.093      |                  | 0.6886            | 0.6205                 |       |        |                   |
|                               | C5     | 28.621 | 18.893 | 9.728       |                  | 0.3236            | 0.7991                 |       |        |                   |
| Model                         | M1     | 24.881 | 16.615 | 8.266       |                  | -1.1384           | 2.2014                 | 1.563 | 0.4482 |                   |
|                               | M2     | 27.27  | 18.745 | 8.525       |                  | -0.8794           | 1.8396                 |       |        |                   |
|                               | M3     | 27.809 | 18.906 | 8.903       |                  | -0.5014           | 1.4156                 |       |        |                   |
|                               | M4     | 26.728 | 17.512 | 9.216       |                  | -0.1884           | 1.1395                 |       |        |                   |
|                               | M5     | 24.512 | 15.393 | 9.119       |                  | -0.2854           | 1.2187                 |       |        |                   |
| MCC950                        | MC1    | 25.867 | 16.681 | 9.186       |                  | -0.2184           | 1.1634                 | 1.446 | 0.4436 | 0.689798208       |
|                               | MC2    | 26.928 | 18.379 | 8.549       |                  | -0.8554           | 1.8093                 |       |        |                   |
|                               | MC3    | 28.38  | 19.648 | 8.732       |                  | -0.6724           | 1.5937                 |       |        |                   |
|                               | MC4    | 28.153 | 19.633 | 8.52        |                  | -0.8844           | 1.846                  |       |        |                   |
|                               | MC5    | 27.544 | 17.851 | 9.693       |                  | 0.2886            | 0.8187                 |       |        |                   |

| mRNA level of TLR4 in macrophages      |        |           |        |             |                  |                   |                        |       |        |                   |
|----------------------------------------|--------|-----------|--------|-------------|------------------|-------------------|------------------------|-------|--------|-------------------|
|                                        |        | TLR4      | GAPDH  |             |                  |                   |                        |       |        |                   |
| Group                                  | number | CT        | CT     | $\Delta$ CT | $\Delta$ CT Mean | $\Delta\Delta$ CT | $2^{-\Delta\Delta$ CT} | Mean  | SD     | Compared to Model |
| Control                                | C1     | 26.312    | 22.925 | 3.387       | 3.1784           | 0.2086            | 0.8654                 | 1.006 | 0.1271 | 0.000685222       |
|                                        | C2     | 24.764    | 21.443 | 3.321       |                  | 0.1426            | 0.9059                 |       |        |                   |
|                                        | C3     | 24.814    | 21.62  | 3.194       |                  | 0.0156            | 0.9892                 |       |        |                   |
|                                        | C4     | 23.896    | 20.928 | 2.968       |                  | -0.2104           | 1.157                  |       |        |                   |
|                                        | C5     | 25.364    | 22.342 | 3.022       |                  | -0.1564           | 1.1145                 |       |        |                   |
| Model                                  | M1     | 25.201    | 22.9   | 2.301       |                  | -0.8774           | 1.8371                 | 1.533 | 0.1794 |                   |
|                                        | M2     | 23.876    | 21.244 | 2.632       |                  | -0.5464           | 1.4604                 |       |        |                   |
|                                        | M3     | 24.308    | 21.756 | 2.552       |                  | -0.6264           | 1.5437                 |       |        |                   |
|                                        | M4     | 23.226    | 20.52  | 2.706       |                  | -0.4724           | 1.3874                 |       |        |                   |
|                                        | M5     | 23.707    | 21.049 | 2.658       |                  | -0.5204           | 1.4344                 |       |        |                   |
| MCC950                                 | MC1    | 25.83     | 23.023 | 2.807       |                  | -0.3714           | 1.2936                 | 1.332 | 0.1784 | 0.113651912       |
|                                        | MC2    | 24.757    | 22.298 | 2.459       |                  | -0.7194           | 1.6465                 |       |        |                   |
|                                        | MC3    | 24.921    | 22.083 | 2.838       |                  | -0.3404           | 1.2661                 |       |        |                   |
|                                        | MC4    | 24.386    | 21.492 | 2.894       |                  | -0.2844           | 1.2179                 |       |        |                   |
|                                        | MC5    | 25.296    | 22.421 | 2.875       |                  | -0.3034           | 1.234                  |       |        |                   |
| mRNA level of NLRP3 in macrophages     |        |           |        |             |                  |                   |                        |       |        |                   |
|                                        |        | NLRP3     | GAPDH  |             |                  |                   |                        |       |        |                   |
| Group                                  | number | CT        | CT     | $\Delta$ CT | $\Delta$ CT Mean | $\Delta\Delta$ CT | $2^{-\Delta\Delta$ CT} | Mean  | SD     | Compared to Model |
| Control                                | C1     | 25.15     | 22.925 | 2.225       | 2.2858           | -0.0608           | 1.043                  | 1.002 | 0.0629 | 1.20963E-06       |
|                                        | C2     | 23.779    | 21.443 | 2.336       |                  | 0.0502            | 0.9658                 |       |        |                   |
|                                        | C3     | 23.817    | 21.62  | 2.197       |                  | -0.0888           | 1.0635                 |       |        |                   |
|                                        | C4     | 23.35     | 20.928 | 2.422       |                  | 0.1362            | 0.9099                 |       |        |                   |
|                                        | C5     | 24.591    | 22.342 | 2.249       |                  | -0.0368           | 1.0258                 |       |        |                   |
| Model                                  | M1     | 24.501    | 22.9   | 1.601       |                  | -0.6848           | 1.6075                 | 1.54  | 0.0685 |                   |
|                                        | M2     | 22.943    | 21.244 | 1.699       |                  | -0.5868           | 1.5019                 |       |        |                   |
|                                        | M3     | 23.416    | 21.756 | 1.66        |                  | -0.6258           | 1.5431                 |       |        |                   |
|                                        | M4     | 22.127    | 20.52  | 1.607       |                  | -0.6788           | 1.6008                 |       |        |                   |
|                                        | M5     | 22.804    | 21.049 | 1.755       |                  | -0.5308           | 1.4447                 |       |        |                   |
| MCC950                                 | MC1    | 24.682    | 23.023 | 1.659       |                  | -0.6268           | 1.5441                 | 1.623 | 0.0904 | 0.140016096       |
|                                        | MC2    | 23.844    | 22.298 | 1.546       |                  | -0.7398           | 1.6699                 |       |        |                   |
|                                        | MC3    | 23.575    | 22.083 | 1.492       |                  | -0.7938           | 1.7336                 |       |        |                   |
|                                        | MC4    | 23.177    | 21.492 | 1.685       |                  | -0.6008           | 1.5166                 |       |        |                   |
|                                        | MC5    | 23.985    | 22.421 | 1.564       |                  | -0.7218           | 1.6492                 |       |        |                   |
| mRNA level of Caspase-1 in macrophages |        |           |        |             |                  |                   |                        |       |        |                   |
|                                        |        | Caspase-1 | GAPDH  |             |                  |                   |                        |       |        |                   |
| Group                                  | number | CT        | CT     | $\Delta$ CT | $\Delta$ CT Mean | $\Delta\Delta$ CT | $2^{-\Delta\Delta$ CT} | Mean  | SD     | Compared to Model |
| Control                                | C1     | 23.286    | 22.925 | 0.361       | 0.7484           | -0.3874           | 1.308                  | 1.012 | 0.1832 | 0.004469098       |
|                                        | C2     | 22.214    | 21.443 | 0.771       |                  | 0.0226            | 0.9845                 |       |        |                   |
|                                        | C3     | 22.49     | 21.62  | 0.87        |                  | 0.1216            | 0.9192                 |       |        |                   |
|                                        | C4     | 21.963    | 20.928 | 1.035       |                  | 0.2866            | 0.8198                 |       |        |                   |
|                                        | C5     | 23.047    | 22.342 | 0.705       |                  | -0.0434           | 1.0305                 |       |        |                   |
| Model                                  | M1     | 23.151    | 22.9   | 0.251       |                  | -0.4974           | 1.4117                 | 1.347 | 0.0549 |                   |
|                                        | M2     | 21.617    | 21.244 | 0.373       |                  | -0.3754           | 1.2972                 |       |        |                   |
|                                        | M3     | 22.054    | 21.756 | 0.298       |                  | -0.4504           | 1.3664                 |       |        |                   |
|                                        | M4     | 20.909    | 20.52  | 0.389       |                  | -0.3594           | 1.2829                 |       |        |                   |
|                                        | M5     | 21.336    | 21.049 | 0.287       |                  | -0.4614           | 1.3769                 |       |        |                   |
| MCC950                                 | MC1    | 22.706    | 23.023 | -0.317      |                  | -1.0654           | 2.0928                 | 1.772 | 0.5324 | 0.113803901       |
|                                        | MC2    | 22.489    | 22.298 | 0.191       |                  | -0.5574           | 1.4716                 |       |        |                   |
|                                        | MC3    | 21.486    | 22.083 | -0.597      |                  | -1.3454           | 2.541                  |       |        |                   |
|                                        | MC4    | 21.643    | 21.492 | 0.151       |                  | -0.5974           | 1.513                  |       |        |                   |
|                                        | MC5    | 22.858    | 22.421 | 0.437       |                  | -0.3114           | 1.2409                 |       |        |                   |



| mRNA level of IL-1 $\beta$ in macrophages |        |              |        |             |                  |                   |                        |       |        |                   |
|-------------------------------------------|--------|--------------|--------|-------------|------------------|-------------------|------------------------|-------|--------|-------------------|
|                                           |        | IL-1 $\beta$ | GAPDH  |             |                  |                   |                        |       |        |                   |
| Group                                     | number | CT           | CT     | $\Delta$ CT | $\Delta$ CT Mean | $\Delta\Delta$ CT | $2^{-\Delta\Delta$ CT} | Mean  | SD     | Compared to Model |
| Control                                   | C1     | 19.322       | 22.925 | -3.603      | -3.754           | 0.151             | 0.9006                 | 1.004 | 0.0952 | 6.64592E-07       |
|                                           | C2     | 17.832       | 21.443 | -3.611      |                  | 0.143             | 0.9056                 |       |        |                   |
|                                           | C3     | 17.781       | 21.62  | -3.839      |                  | -0.085            | 1.0607                 |       |        |                   |
|                                           | C4     | 17.116       | 20.928 | -3.812      |                  | -0.058            | 1.041                  |       |        |                   |
|                                           | C5     | 18.437       | 22.342 | -3.905      |                  | -0.151            | 1.1103                 |       |        |                   |
| Model                                     | M1     | 18.417       | 22.9   | -4.483      |                  | -0.729            | 1.6575                 | 1.674 | 0.0493 |                   |
|                                           | M2     | 16.816       | 21.244 | -4.428      |                  | -0.674            | 1.5955                 |       |        |                   |
|                                           | M3     | 17.22        | 21.756 | -4.536      |                  | -0.782            | 1.7195                 |       |        |                   |
|                                           | M4     | 16.005       | 20.52  | -4.515      |                  | -0.761            | 1.6947                 |       |        |                   |
|                                           | M5     | 16.528       | 21.049 | -4.521      |                  | -0.767            | 1.7017                 |       |        |                   |
| MCC950                                    | MC1    | 18.323       | 23.023 | -4.7        |                  | -0.946            | 1.9265                 | 1.701 | 0.1375 | 0.684793167       |
|                                           | MC2    | 17.879       | 22.298 | -4.419      |                  | -0.665            | 1.5856                 |       |        |                   |
|                                           | MC3    | 17.593       | 22.083 | -4.49       |                  | -0.736            | 1.6656                 |       |        |                   |
|                                           | MC4    | 16.951       | 21.492 | -4.541      |                  | -0.787            | 1.7255                 |       |        |                   |
|                                           | MC5    | 17.986       | 22.421 | -4.435      |                  | -0.681            | 1.6033                 |       |        |                   |
| mRNA level of IL-18 in macrophages        |        |              |        |             |                  |                   |                        |       |        |                   |
|                                           |        | IL-18        | GAPDH  |             |                  |                   |                        |       |        |                   |
| Group                                     | number | CT           | CT     | $\Delta$ CT | $\Delta$ CT Mean | $\Delta\Delta$ CT | $2^{-\Delta\Delta$ CT} | Mean  | SD     | Compared to Model |
| Control                                   | C1     | 25.699       | 22.925 | 2.774       | 2.6226           | 0.1514            | 0.9004                 | 1.004 | 0.0989 | 0.000150999       |
|                                           | C2     | 24.12        | 21.443 | 2.677       |                  | 0.0544            | 0.963                  |       |        |                   |
|                                           | C3     | 24.328       | 21.62  | 2.708       |                  | 0.0854            | 0.9425                 |       |        |                   |
|                                           | C4     | 23.445       | 20.928 | 2.517       |                  | -0.1056           | 1.0759                 |       |        |                   |
|                                           | C5     | 24.779       | 22.342 | 2.437       |                  | -0.1856           | 1.1373                 |       |        |                   |
| Model                                     | M1     | 25.173       | 22.9   | 2.273       |                  | -0.3496           | 1.2742                 | 1.39  | 0.0821 |                   |
|                                           | M2     | 23.406       | 21.244 | 2.162       |                  | -0.4606           | 1.3761                 |       |        |                   |
|                                           | M3     | 23.884       | 21.756 | 2.128       |                  | -0.4946           | 1.4089                 |       |        |                   |
|                                           | M4     | 22.673       | 20.52  | 2.153       |                  | -0.4696           | 1.3847                 |       |        |                   |
|                                           | M5     | 23.083       | 21.049 | 2.034       |                  | -0.5886           | 1.5038                 |       |        |                   |
| MCC950                                    | MC1    | 25.372       | 23.023 | 2.349       |                  | -0.2736           | 1.2088                 | 1.28  | 0.1336 | 0.157560545       |
|                                           | MC2    | 24.585       | 22.298 | 2.287       |                  | -0.3356           | 1.2619                 |       |        |                   |
|                                           | MC3    | 24.122       | 22.083 | 2.039       |                  | -0.5836           | 1.4986                 |       |        |                   |
|                                           | MC4    | 23.751       | 21.492 | 2.259       |                  | -0.3636           | 1.2866                 |       |        |                   |
|                                           | MC5    | 24.848       | 22.421 | 2.427       |                  | -0.1956           | 1.1452                 |       |        |                   |
| mRNA level of GSDMD in macrophages        |        |              |        |             |                  |                   |                        |       |        |                   |
|                                           |        | GSDMD        | GAPDH  |             |                  |                   |                        |       |        |                   |
| Group                                     | number | CT           | CT     | $\Delta$ CT | $\Delta$ CT Mean | $\Delta\Delta$ CT | $2^{-\Delta\Delta$ CT} | Mean  | SD     | Compared to Model |
| Control                                   | C1     | 26.185       | 22.925 | 3.26        | 3.3098           | -0.0498           | 1.0351                 | 1.002 | 0.0771 | 0.19799753        |
|                                           | C2     | 24.939       | 21.443 | 3.496       |                  | 0.1862            | 0.8789                 |       |        |                   |
|                                           | C3     | 24.886       | 21.62  | 3.266       |                  | -0.0438           | 1.0308                 |       |        |                   |
|                                           | C4     | 24.259       | 20.928 | 3.331       |                  | 0.0212            | 0.9854                 |       |        |                   |
|                                           | C5     | 25.538       | 22.342 | 3.196       |                  | -0.1138           | 1.0821                 |       |        |                   |
| Model                                     | M1     | 25.938       | 22.9   | 3.038       |                  | -0.2718           | 1.2073                 | 1.074 | 0.0836 |                   |
|                                           | M2     | 24.461       | 21.244 | 3.217       |                  | -0.0928           | 1.0664                 |       |        |                   |
|                                           | M3     | 25.091       | 21.756 | 3.335       |                  | 0.0252            | 0.9827                 |       |        |                   |
|                                           | M4     | 23.784       | 20.52  | 3.264       |                  | -0.0458           | 1.0323                 |       |        |                   |
|                                           | M5     | 24.247       | 21.049 | 3.198       |                  | -0.1118           | 1.0806                 |       |        |                   |
| MCC950                                    | MC1    | 26.394       | 23.023 | 3.371       |                  | 0.0612            | 0.9585                 | 1.14  | 0.2974 | 0.645627377       |
|                                           | MC2    | 25.458       | 22.298 | 3.16        |                  | -0.1498           | 1.1094                 |       |        |                   |
|                                           | MC3    | 25.696       | 22.083 | 3.613       |                  | 0.3032            | 0.8105                 |       |        |                   |
|                                           | MC4    | 24.503       | 21.492 | 3.011       |                  | -0.2988           | 1.2301                 |       |        |                   |
|                                           | MC5    | 25.061       | 22.421 | 2.64        |                  | -0.6698           | 1.5909                 |       |        |                   |

| <b>mRNA level of TNF-<math>\alpha</math> in macrophages</b> |        |               |        |             |                  |                   |                        |       |        |                   |
|-------------------------------------------------------------|--------|---------------|--------|-------------|------------------|-------------------|------------------------|-------|--------|-------------------|
|                                                             |        | TNF- $\alpha$ | GAPDH  |             |                  |                   |                        |       |        |                   |
| Group                                                       | number | CT            | CT     | $\Delta$ CT | $\Delta$ CT Mean | $\Delta\Delta$ CT | $2^{-\Delta\Delta$ CT} | Mean  | SD     | Compared to Model |
| Control                                                     | C1     | 25.837        | 22.925 | 2.912       | 2.672            | 0.24              | 0.8467                 | 1.012 | 0.1823 | 0.155606346       |
|                                                             | C2     | 24.108        | 21.443 | 2.665       |                  | -0.007            | 1.0049                 |       |        |                   |
|                                                             | C3     | 23.899        | 21.62  | 2.279       |                  | -0.393            | 1.3131                 |       |        |                   |
|                                                             | C4     | 23.592        | 20.928 | 2.664       |                  | -0.008            | 1.0056                 |       |        |                   |
|                                                             | C5     | 25.182        | 22.342 | 2.84        |                  | 0.168             | 0.8901                 |       |        |                   |
| Model                                                       | M1     | 25.22         | 22.9   | 2.32        |                  | -0.352            | 1.2763                 | 1.214 | 0.2231 |                   |
|                                                             | M2     | 23.63         | 21.244 | 2.386       |                  | -0.286            | 1.2193                 |       |        |                   |
|                                                             | M3     | 23.819        | 21.756 | 2.063       |                  | -0.609            | 1.5252                 |       |        |                   |
|                                                             | M4     | 23.329        | 20.52  | 2.809       |                  | 0.137             | 0.9094                 |       |        |                   |
|                                                             | M5     | 23.532        | 21.049 | 2.483       |                  | -0.189            | 1.14                   |       |        |                   |
| MCC950                                                      | MC1    | 25.489        | 23.023 | 2.466       |                  | -0.206            | 1.1535                 | 1.501 | 0.3064 | 0.128772863       |
|                                                             | MC2    | 24.072        | 22.298 | 1.774       |                  | -0.898            | 1.8635                 |       |        |                   |
|                                                             | MC3    | 23.946        | 22.083 | 1.863       |                  | -0.809            | 1.752                  |       |        |                   |
|                                                             | MC4    | 23.598        | 21.492 | 2.106       |                  | -0.566            | 1.4804                 |       |        |                   |
|                                                             | MC5    | 24.764        | 22.421 | 2.343       |                  | -0.329            | 1.2561                 |       |        |                   |
| <b>mRNA level of Caspase-3 in macrophages</b>               |        |               |        |             |                  |                   |                        |       |        |                   |
|                                                             |        | Caspase-3     | GAPDH  |             |                  |                   |                        |       |        |                   |
| Group                                                       | number | CT            | CT     | $\Delta$ CT | $\Delta$ CT Mean | $\Delta\Delta$ CT | $2^{-\Delta\Delta$ CT} | Mean  | SD     | Compared to Model |
| Control                                                     | C1     | 23.683        | 22.925 | 0.758       | 0.855            | -0.097            | 1.0695                 | 1.01  | 0.1593 | 0.05885701        |
|                                                             | C2     | 22.144        | 21.443 | 0.701       |                  | -0.154            | 1.1127                 |       |        |                   |
|                                                             | C3     | 22.791        | 21.62  | 1.171       |                  | 0.316             | 0.8033                 |       |        |                   |
|                                                             | C4     | 21.958        | 20.928 | 1.03        |                  | 0.175             | 0.8858                 |       |        |                   |
|                                                             | C5     | 22.957        | 22.342 | 0.615       |                  | -0.24             | 1.181                  |       |        |                   |
| Model                                                       | M1     | 24.19         | 22.9   | 1.29        |                  | 0.435             | 0.7397                 | 0.809 | 0.1278 |                   |
|                                                             | M2     | 22.673        | 21.244 | 1.429       |                  | 0.574             | 0.6718                 |       |        |                   |
|                                                             | M3     | 22.613        | 21.756 | 0.857       |                  | 0.002             | 0.9986                 |       |        |                   |
|                                                             | M4     | 21.76         | 20.52  | 1.24        |                  | 0.385             | 0.7658                 |       |        |                   |
|                                                             | M5     | 22.103        | 21.049 | 1.054       |                  | 0.199             | 0.8712                 |       |        |                   |
| MCC950                                                      | MC1    | 23.982        | 23.023 | 0.959       |                  | 0.104             | 0.9304                 | 0.977 | 0.1714 | 0.117298488       |
|                                                             | MC2    | 22.849        | 22.298 | 0.551       |                  | -0.304            | 1.2346                 |       |        |                   |
|                                                             | MC3    | 22.868        | 22.083 | 0.785       |                  | -0.07             | 1.0497                 |       |        |                   |
|                                                             | MC4    | 22.682        | 21.492 | 1.19        |                  | 0.335             | 0.7928                 |       |        |                   |
|                                                             | MC5    | 23.463        | 22.421 | 1.042       |                  | 0.187             | 0.8784                 |       |        |                   |
| <b>mRNA level of Caspase-4 in macrophages</b>               |        |               |        |             |                  |                   |                        |       |        |                   |
|                                                             |        | Caspase-4     | GAPDH  |             |                  |                   |                        |       |        |                   |
| Group                                                       | number | CT            | CT     | $\Delta$ CT | $\Delta$ CT Mean | $\Delta\Delta$ CT | $2^{-\Delta\Delta$ CT} | Mean  | SD     | Compared to Model |
| Control                                                     | C1     | 22.537        | 22.925 | -0.388      | -0.2198          | -0.1682           | 1.1237                 | 1.003 | 0.0845 | 0.113366239       |
|                                                             | C2     | 21.194        | 21.443 | -0.249      |                  | -0.0292           | 1.0204                 |       |        |                   |
|                                                             | C3     | 21.571        | 21.62  | -0.049      |                  | 0.1708            | 0.8883                 |       |        |                   |
|                                                             | C4     | 20.705        | 20.928 | -0.223      |                  | -0.0032           | 1.0022                 |       |        |                   |
|                                                             | C5     | 22.152        | 22.342 | -0.19       |                  | 0.0298            | 0.9796                 |       |        |                   |
| Model                                                       | M1     | 22.002        | 22.9   | -0.898      |                  | -0.6782           | 1.6001                 | 1.24  | 0.2857 |                   |
|                                                             | M2     | 20.987        | 21.244 | -0.257      |                  | -0.0372           | 1.0261                 |       |        |                   |
|                                                             | M3     | 21.285        | 21.756 | -0.471      |                  | -0.2512           | 1.1902                 |       |        |                   |
|                                                             | M4     | 20.416        | 20.52  | -0.104      |                  | 0.1158            | 0.9229                 |       |        |                   |
|                                                             | M5     | 20.284        | 21.049 | -0.765      |                  | -0.5452           | 1.4592                 |       |        |                   |
| MCC950                                                      | MC1    | 22.542        | 23.023 | -0.481      |                  | -0.2612           | 1.1985                 | 1.257 | 0.1229 | 0.902215633       |
|                                                             | MC2    | 21.602        | 22.298 | -0.696      |                  | -0.4762           | 1.3911                 |       |        |                   |
|                                                             | MC3    | 21.732        | 22.083 | -0.351      |                  | -0.1312           | 1.0952                 |       |        |                   |
|                                                             | MC4    | 20.969        | 21.492 | -0.523      |                  | -0.3032           | 1.2339                 |       |        |                   |
|                                                             | MC5    | 21.749        | 22.421 | -0.672      |                  | -0.4522           | 1.3681                 |       |        |                   |

| <b>mRNA level of Caspase-5 in macrophages</b> |        |           |        |             |                  |                   |                        |       |        |                   |
|-----------------------------------------------|--------|-----------|--------|-------------|------------------|-------------------|------------------------|-------|--------|-------------------|
|                                               |        | Caspase-5 | GAPDH  |             |                  |                   |                        |       |        |                   |
| Group                                         | number | CT        | CT     | $\Delta$ CT | $\Delta$ CT Mean | $\Delta\Delta$ CT | $2^{-\Delta\Delta$ CT} | Mean  | SD     | Compared to Model |
| Control                                       | C1     | 23.562    | 22.925 | 0.637       | 0.3638           | 0.2732            | 0.8275                 | 1.005 | 0.1099 | 0.550273667       |
|                                               | C2     | 21.846    | 21.443 | 0.403       |                  | 0.0392            | 0.9732                 |       |        |                   |
|                                               | C3     | 21.916    | 21.62  | 0.296       |                  | -0.0678           | 1.0481                 |       |        |                   |
|                                               | C4     | 21.169    | 20.928 | 0.241       |                  | -0.1228           | 1.0888                 |       |        |                   |
|                                               | C5     | 22.584    | 22.342 | 0.242       |                  | -0.1218           | 1.0881                 |       |        |                   |
| Model                                         | M1     | 23.477    | 22.9   | 0.577       |                  | 0.2132            | 0.8626                 | 0.935 | 0.2252 |                   |
|                                               | M2     | 22.338    | 21.244 | 1.094       |                  | 0.7302            | 0.6028                 |       |        |                   |
|                                               | M3     | 21.86     | 21.756 | 0.104       |                  | -0.2598           | 1.1973                 |       |        |                   |
|                                               | M4     | 20.969    | 20.52  | 0.449       |                  | 0.0852            | 0.9427                 |       |        |                   |
|                                               | M5     | 21.314    | 21.049 | 0.265       |                  | -0.0988           | 1.0709                 |       |        |                   |
| MCC950                                        | MC1    | 23.033    | 23.023 | 0.01        |                  | -0.3538           | 1.2779                 | 1.076 | 0.2545 | 0.382970219       |
|                                               | MC2    | 22.761    | 22.298 | 0.463       |                  | 0.0992            | 0.9336                 |       |        |                   |
|                                               | MC3    | 21.971    | 22.083 | -0.112      |                  | -0.4758           | 1.3907                 |       |        |                   |
|                                               | MC4    | 22.234    | 21.492 | 0.742       |                  | 0.3782            | 0.7694                 |       |        |                   |
|                                               | MC5    | 22.776    | 22.421 | 0.355       |                  | -0.0088           | 1.0061                 |       |        |                   |
| <b>mRNA level of NLRP1 in macrophages</b>     |        |           |        |             |                  |                   |                        |       |        |                   |
|                                               |        | NLRP1     | GAPDH  |             |                  |                   |                        |       |        |                   |
| Group                                         | number | CT        | CT     | $\Delta$ CT | $\Delta$ CT Mean | $\Delta\Delta$ CT | $2^{-\Delta\Delta$ CT} | Mean  | SD     | Compared to Model |
| Control                                       | C1     | 25.807    | 22.925 | 2.882       | 3.1518           | -0.2698           | 1.2056                 | 1.016 | 0.1983 | 0.071084337       |
|                                               | C2     | 24.567    | 21.443 | 3.124       |                  | -0.0278           | 1.0195                 |       |        |                   |
|                                               | C3     | 24.974    | 21.62  | 3.354       |                  | 0.2022            | 0.8692                 |       |        |                   |
|                                               | C4     | 24.456    | 20.928 | 3.528       |                  | 0.3762            | 0.7705                 |       |        |                   |
|                                               | C5     | 25.213    | 22.342 | 2.871       |                  | -0.2808           | 1.2149                 |       |        |                   |
| Model                                         | M1     | 26.666    | 22.9   | 3.766       |                  | 0.6142            | 0.6533                 | 0.793 | 0.1343 |                   |
|                                               | M2     | 24.424    | 21.244 | 3.18        |                  | 0.0282            | 0.9806                 |       |        |                   |
|                                               | M3     | 25.248    | 21.756 | 3.492       |                  | 0.3402            | 0.7899                 |       |        |                   |
|                                               | M4     | 23.887    | 20.52  | 3.367       |                  | 0.2152            | 0.8614                 |       |        |                   |
|                                               | M5     | 24.757    | 21.049 | 3.708       |                  | 0.5562            | 0.6801                 |       |        |                   |
| MCC950                                        | MC1    | 26.079    | 23.023 | 3.056       |                  | -0.0958           | 1.0687                 | 0.993 | 0.2656 | 0.172028165       |
|                                               | MC2    | 25.735    | 22.298 | 3.437       |                  | 0.2852            | 0.8206                 |       |        |                   |
|                                               | MC3    | 25.779    | 22.083 | 3.696       |                  | 0.5442            | 0.6858                 |       |        |                   |
|                                               | MC4    | 24.176    | 21.492 | 2.684       |                  | -0.4678           | 1.383                  |       |        |                   |
|                                               | MC5    | 25.565    | 22.421 | 3.144       |                  | -0.0078           | 1.0054                 |       |        |                   |
| <b>mRNA level of NLRC4 in macrophages</b>     |        |           |        |             |                  |                   |                        |       |        |                   |
|                                               |        | NLRC4     | GAPDH  |             |                  |                   |                        |       |        |                   |
| Group                                         | number | CT        | CT     | $\Delta$ CT | $\Delta$ CT Mean | $\Delta\Delta$ CT | $2^{-\Delta\Delta$ CT} | Mean  | SD     | Compared to Model |
| Control                                       | C1     | 27.412    | 22.925 | 4.487       | 4.138            | 0.349             | 0.7851                 | 1.024 | 0.2459 | 0.433049398       |
|                                               | C2     | 25.16     | 21.443 | 3.717       |                  | -0.421            | 1.3389                 |       |        |                   |
|                                               | C3     | 25.587    | 21.62  | 3.967       |                  | -0.171            | 1.1258                 |       |        |                   |
|                                               | C4     | 25.457    | 20.928 | 4.529       |                  | 0.391             | 0.7626                 |       |        |                   |
|                                               | C5     | 26.332    | 22.342 | 3.99        |                  | -0.148            | 1.108                  |       |        |                   |
| Model                                         | M1     | 26.464    | 22.9   | 3.564       |                  | -0.574            | 1.4886                 | 1.16  | 0.2731 |                   |
|                                               | M2     | 25.311    | 21.244 | 4.067       |                  | -0.071            | 1.0504                 |       |        |                   |
|                                               | M3     | 25.525    | 21.756 | 3.769       |                  | -0.369            | 1.2915                 |       |        |                   |
|                                               | M4     | 25.051    | 20.52  | 4.531       |                  | 0.393             | 0.7615                 |       |        |                   |
|                                               | M5     | 24.916    | 21.049 | 3.867       |                  | -0.271            | 1.2066                 |       |        |                   |
| MCC950                                        | MC1    | 26.739    | 23.023 | 3.716       |                  | -0.422            | 1.3398                 | 0.896 | 0.2786 | 0.168765848       |
|                                               | MC2    | 26.901    | 22.298 | 4.603       |                  | 0.465             | 0.7245                 |       |        |                   |
|                                               | MC3    | 26.872    | 22.083 | 4.789       |                  | 0.651             | 0.6368                 |       |        |                   |
|                                               | MC4    | 25.957    | 21.492 | 4.465       |                  | 0.327             | 0.7972                 |       |        |                   |
|                                               | MC5    | 26.587    | 22.421 | 4.166       |                  | 0.028             | 0.9808                 |       |        |                   |

| mRNA level of AIM2 in macrophages |        |        |        |             |                  |                   |                        |       |        |                   |
|-----------------------------------|--------|--------|--------|-------------|------------------|-------------------|------------------------|-------|--------|-------------------|
|                                   |        | AIM2   | GAPDH  |             |                  |                   |                        |       |        |                   |
| Group                             | number | CT     | CT     | $\Delta$ CT | $\Delta$ CT Mean | $\Delta\Delta$ CT | $2^{-\Delta\Delta$ CT} | Mean  | SD     | Compared to Model |
| Control                           | C1     | 27.698 | 22.925 | 4.773       | 4.7902           | -0.0172           | 1.012                  | 1.011 | 0.162  | 0.0854849         |
|                                   | C2     | 26.146 | 21.443 | 4.703       |                  | -0.0872           | 1.0623                 |       |        |                   |
|                                   | C3     | 26.136 | 21.62  | 4.516       |                  | -0.2742           | 1.2093                 |       |        |                   |
|                                   | C4     | 26.114 | 20.928 | 5.186       |                  | 0.3958            | 0.7601                 |       |        |                   |
|                                   | C5     | 27.115 | 22.342 | 4.773       |                  | -0.0172           | 1.012                  |       |        |                   |
| Model                             | M1     | 28.009 | 22.9   | 5.109       |                  | 0.3188            | 0.8017                 | 1.298 | 0.2836 |                   |
|                                   | M2     | 25.459 | 21.244 | 4.215       |                  | -0.5752           | 1.4899                 |       |        |                   |
|                                   | M3     | 26.019 | 21.756 | 4.263       |                  | -0.5272           | 1.4411                 |       |        |                   |
|                                   | M4     | 24.794 | 20.52  | 4.274       |                  | -0.5162           | 1.4302                 |       |        |                   |
|                                   | M5     | 25.433 | 21.049 | 4.384       |                  | -0.4062           | 1.3252                 |       |        |                   |
| MCC950                            | MC1    | 28.324 | 23.023 | 5.301       |                  | 0.5108            | 0.7018                 | 1.015 | 0.1985 | 0.105649418       |
|                                   | MC2    | 27.064 | 22.298 | 4.766       |                  | -0.0242           | 1.0169                 |       |        |                   |
|                                   | MC3    | 26.809 | 22.083 | 4.726       |                  | -0.0642           | 1.0455                 |       |        |                   |
|                                   | MC4    | 25.957 | 21.492 | 4.465       |                  | -0.3252           | 1.2528                 |       |        |                   |
|                                   | MC5    | 27.128 | 22.421 | 4.707       |                  | -0.0832           | 1.0594                 |       |        |                   |

The following table shows the antibodies used in this experiment.

|                    | Name                                    | Company    | Catalogue number | Molecular weight                   | Dilution rate        |
|--------------------|-----------------------------------------|------------|------------------|------------------------------------|----------------------|
| Primary antibodies | ASC                                     | Santa Cruz | sc-514414        | Monomer 24KDa<br>Dimer 48KDa       | WB 1:500             |
|                    | Caspase-1                               | Santa Cruz | sc-56036         | Full length 45KDa<br>Cleaved 20KDa | WB 1:250             |
|                    | GAPDH                                   | ABCAM      | ab181602         | 36KDa                              | WB 1:10000           |
|                    | GSDMD                                   | Santa Cruz | sc-393581        | Full length 53KDa<br>GSDMD-N 30KDa | WB 1:250<br>IF 1:50  |
|                    | IL-1 $\beta$                            | ABCAM      | ab9722           | Full length 30KDa<br>Cleaved 17KDa | WB 1:500             |
|                    | IL-18                                   | Invitrogen | PA5-76082        | Full length 24KDa<br>Cleaved 18KDa | WB 1:1000            |
|                    | MOMA2                                   | Santa Cruz | sc-59332         | -                                  | IF 1:100             |
|                    | NLRP3                                   | Invitrogen | PA5-115661       | 114KDa                             | WB 1:500<br>IF 1:100 |
|                    | TLR4                                    | Santa Cruz | sc-293072        | 95/120KDa                          | 1:500                |
| Secondary          | Anti-mouse IgG,<br>HRP-linked Antibody  | CST        | #7076            | -                                  | 1:1000               |
|                    | Anti-rabbit IgG,<br>HRP-linked Antibody | ABCAM      | Ab621            | -                                  | 1:10000              |

The prestained protein Ladder was purchased from Thermo Fisher SCIENTIFIC (Catalogue number: 26616).

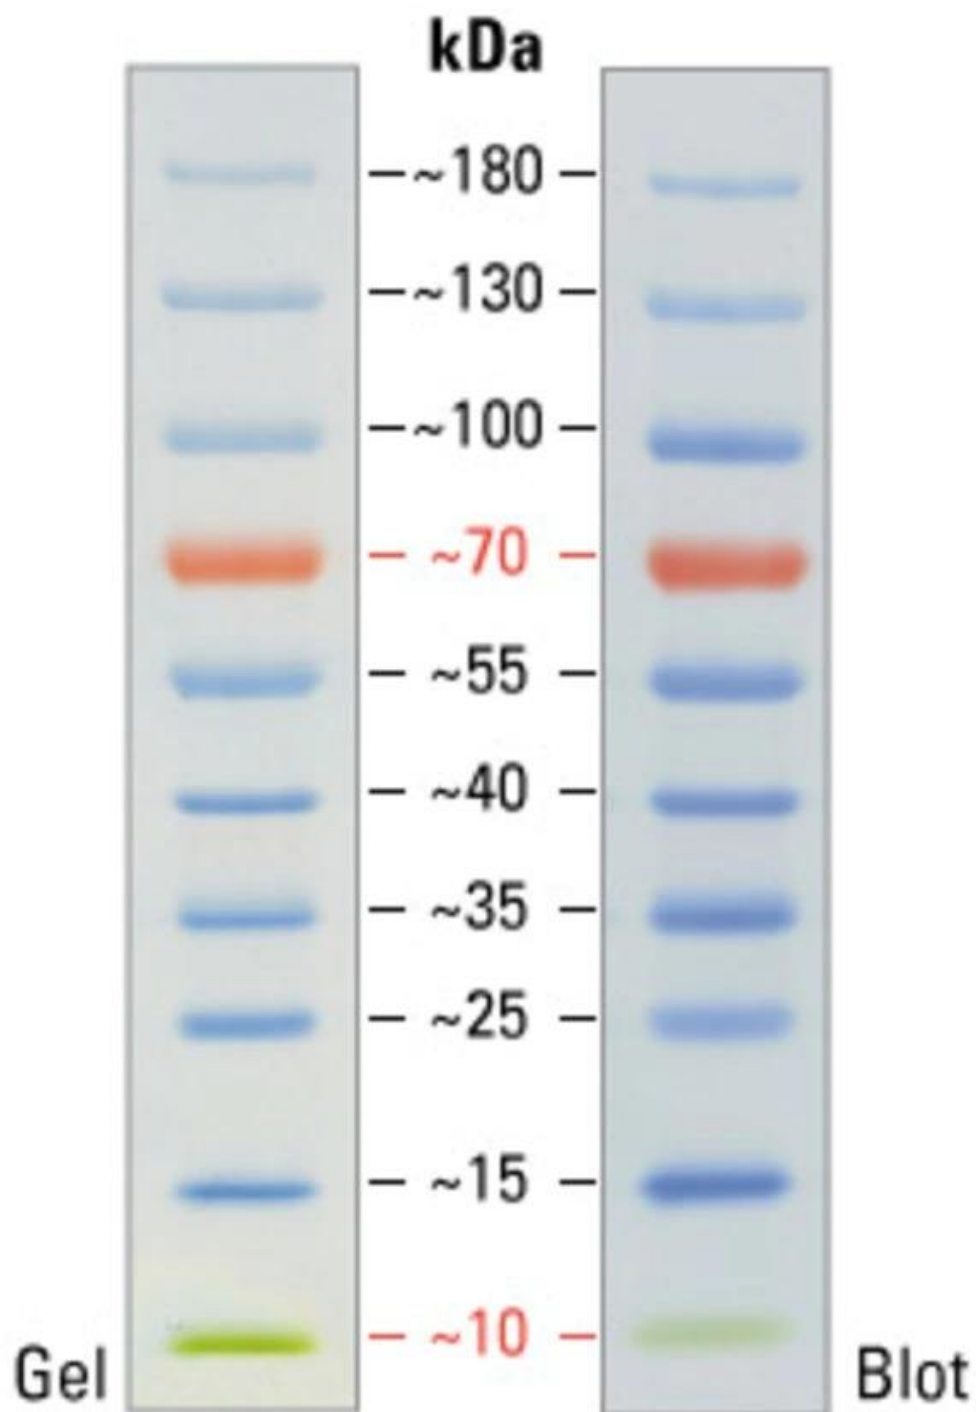

The protein samples for Western blot were divided into Control group (C1~C5, n=5), Model group (M1~M5, n=5) and MCC950 group (MC1~MC5, n=5).

## The protein bands of TLR4 in aortas

### TLR4 in aortas

Sample order:

none / C1/ M1/ MC1/ none / C2/ M2/ MC2

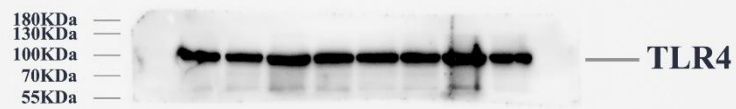

### TLR4 in aortas

Sample order:

none / C2/ M2/ MC2/ none / C3/ M3/ MC3

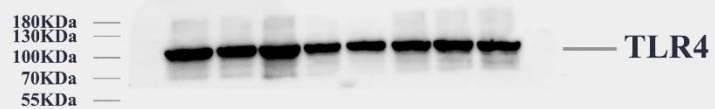

## TLR4 in aortas

Sample order:

none / C3/ M3/ MC3/ none / C4/ M4/ MC4

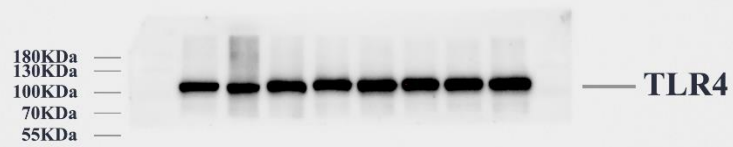

## TLR4 in aortas

Sample order:

none / C4/ M4/ MC4/ none / C5/ M5/ MC5

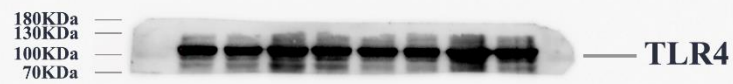



## The protein bands of TLR4 in macrophages

### TLR4 in macrophages

Sample order:

C1/ M1/ MC1/ C2/ M2/ MC2

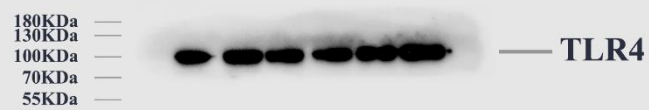

### TLR4 in macrophages

Sample order:

C2/ M2/ MC2/ C3/ M3/ MC3

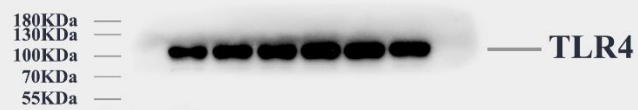

## TLR4 in macrophages

Sample order:

C4/ M4/ MC4/ C5/ M5/ MC5

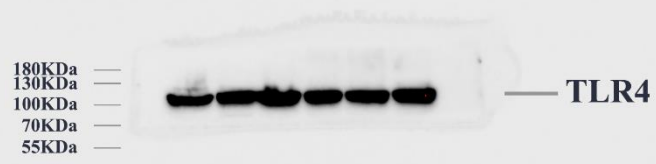

**The protein bands of NLRP3 in aortas**

**NLRP3 in aortas**

**Sample order:**

**none / C1/ M1/ MC2/ none / C2/ M2/ MC2**

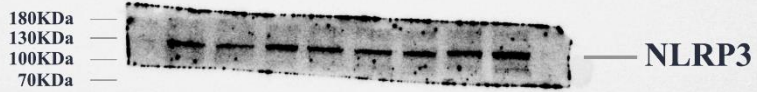

**NLRP3 in aortas**

**Sample order:**

**none / C2/ M2/ MC2/ none / C3/ M3/ MC3**

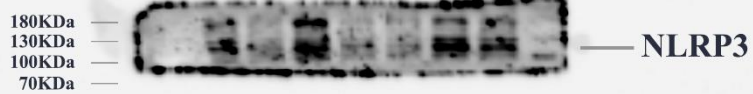

## NLRP3

### Sample order:

none / C3/ M3/ MC3/ none / C4/ M4/ MC4

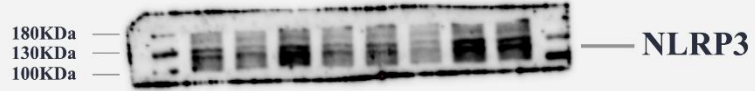

## NLRP3 in aortas

### Sample order:

none / C4/ M4/ MC4/ none / C5/ M5/ MC5

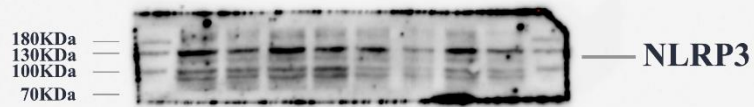

## The protein bands of NLRP3 in macrophages

### NLRP3 in macrophages

Sample order:

C1/ M1/ MC1/ C2/ M2/ MC2

180KDa  
130KDa  
100KDa  
70KDa

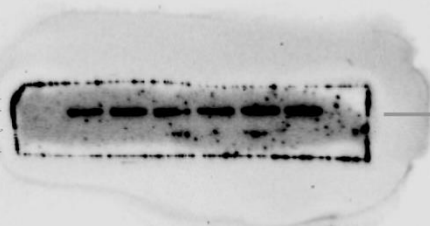

### NLRP3 in macrophages

Sample order:

C2/ M2/ MC2/ C3/ M3/ MC3

180KDa  
130KDa  
100KDa  
70KDa

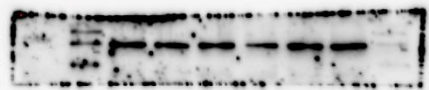

## NLRP3 in macrophages

Sample order:

C4/ M4/ MC4/ C5/ M5/ MC5

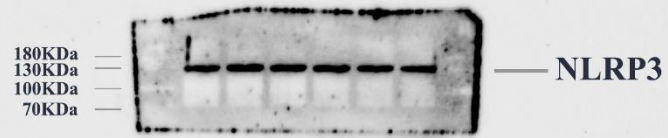

## The protein bands of ASC monomer in aortas

### ASC monomer in aortas

#### Sample order:

none / C1/ M1/ MC1/ none / C2/ M2/ MC2

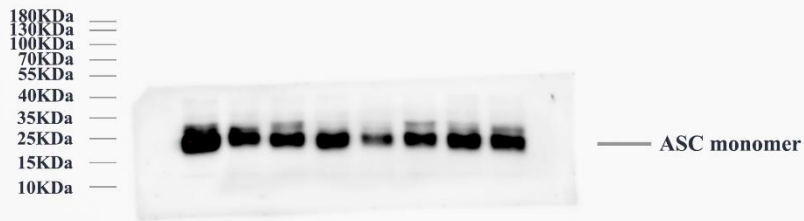

### ASC monomer in aortas

#### Sample order:

none / C3/ M3/ MC3/ none / C4/ M4/ MC4

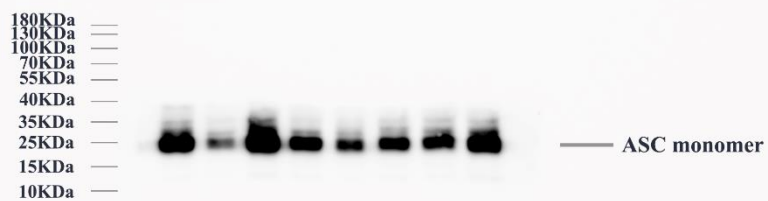

## ASC monomer in aortas

Sample order:

none / C4/ M4/ MC4/ none / C5/ M5/ MC5

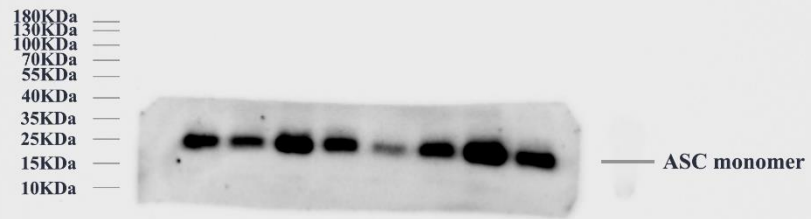



## The protein bands of ASC oligomers in aortas

### ASC Oligomers in aortas

Sample order:

none / C1/ M1/ MC1/ none / C2/ M2/ MC2

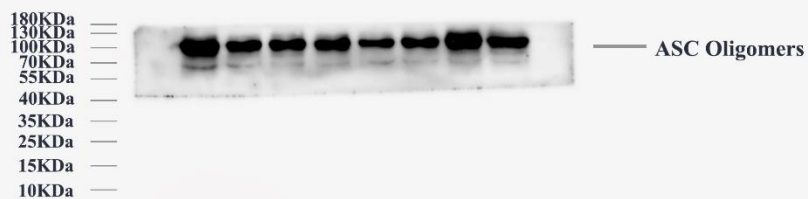

### ASC Oligomers in aortas

Sample order:

none / C3/ M3/ MC3/ none / C4/ M4/ MC4

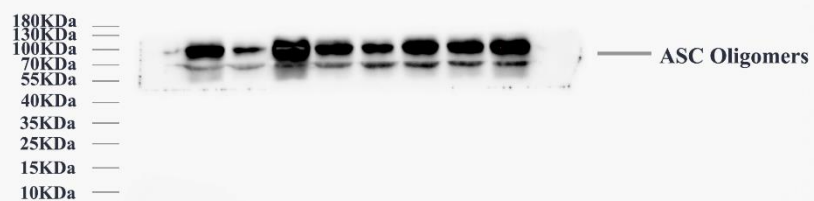

## ASC Oligomers in aortas

Sample order:

none / C4/ M4/ MC4/ none / C5/ M5/ MC5

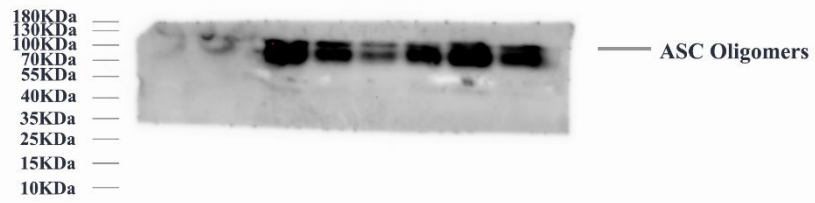

## The protein bands of ASC in macrophages

### ASC in macrophages

Sample order:

C1/ M1/ MC1/ C2/ M2/ MC2/ C3/ M3/ MC3/ C4/ M4/ MC4

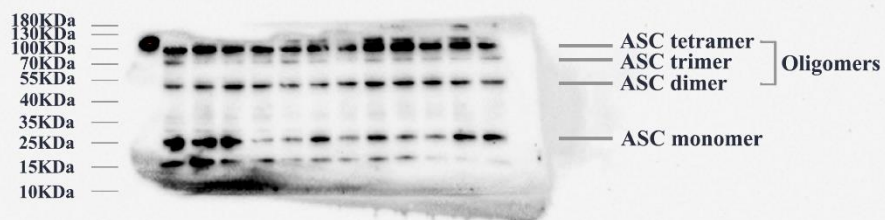

### ASC in macrophages

Sample order:

C2/ M2/ MC2/ C3/ M3/ MC3/ C4/ M4/ MC4/ C5/ M5/ MC5

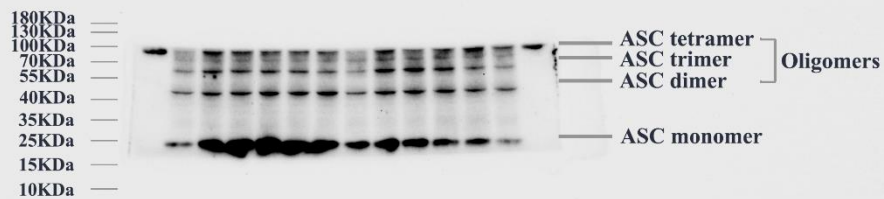

## The protein bands of pro-Caspase1 in aortas

### pro-Caspase1 in aortas

Sample order:

none / C1/ M1/ MC1/ none / C2/ M2/ MC2

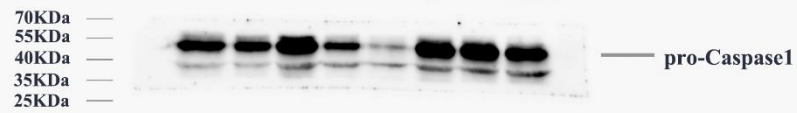

### pro-Caspase1 in aortas

Sample order:

none / C3/ M3/ MC3/ none / C4/ M4/ MC4

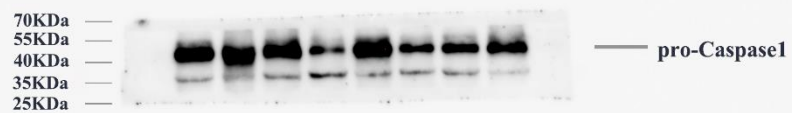

## pro-Caspase1 in aortas

Sample order:

none / C4/ M4/ MC4/ none / C5/ M5/ MC5

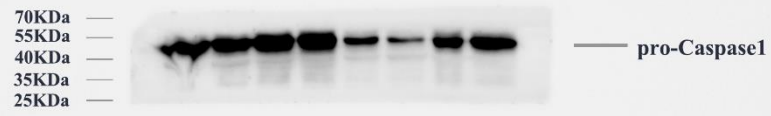

## The protein bands of Caspase1 in aortas

### Caspase-1 in aortas

Sample order:

none / C1/ M1/ MC1/ none / C2/ M2/ MC2

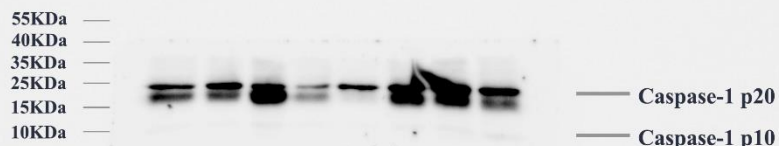

### Caspase-1 in aortas

Sample order:

none / C3/ M3/ MC3/ none / C4/ M4/ MC4

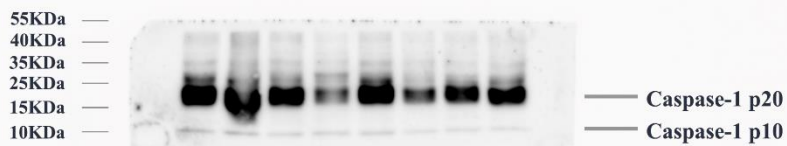

# Caspase-1 in aortas

Sample order:

none / C4/ M4/ MC4/ none / C5/ M5/ MC5

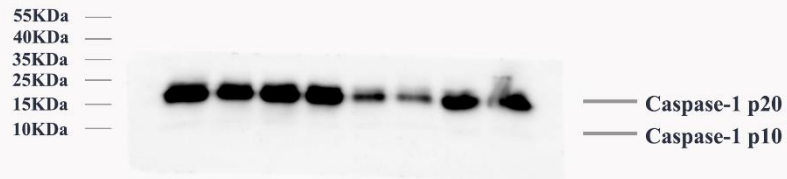

## The protein bands of pro-Caspase1 and Caspase-1 in macrophages

### pro-Caspase1&Caspase-1 in macrophages

Sample order:

C1/ M1/ MC1/ C2/ M2/ MC2

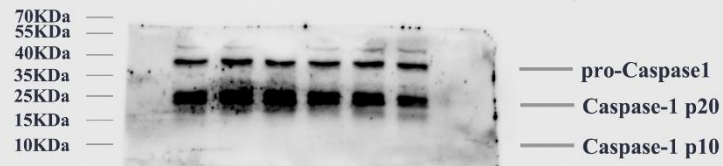

### pro-Caspase1&Caspase-1 in macrophages

Sample order:

C3/ M3/ MC3/ C4/ M4/ MC4

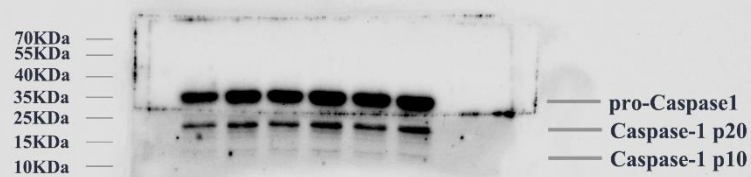



## pro-Caspase1&Caspase-1 in macrophages

Sample order:

C4/ M4/ MC4/ C5/ M5/ MC5

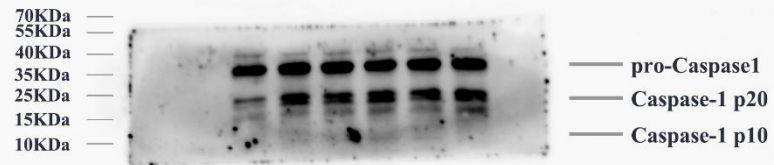

## The protein bands of pro-IL1 $\beta$ and IL-1 $\beta$ in aortas

### pro-IL1 $\beta$ & IL-1 $\beta$ in aortas

Sample order:

none / C1/ M1/ MC1/ none / C2/ M2/ MC2

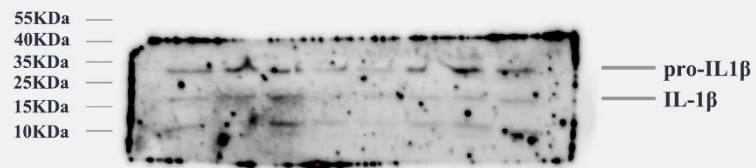

### pro-IL1 $\beta$ & IL-1 $\beta$ in aortas

Sample order:

none / C3/ M3/ MC3/ none / C4/ M4/ MC4

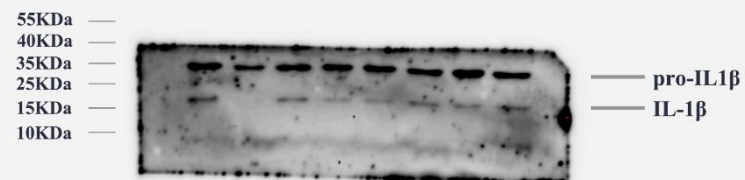

## pro-IL1 $\beta$ & IL-1 $\beta$ in aortas

Sample order:

none / C4/ M4/ MC4/ none / C5/ M5/ MC5

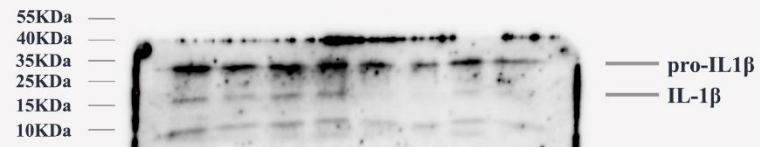

## The protein bands of pro-IL1 $\beta$ in macrophages

### pro-IL1 $\beta$ in macrophages

Sample order:

C1/ M1/ MC1/ C2/ M2/ MC2

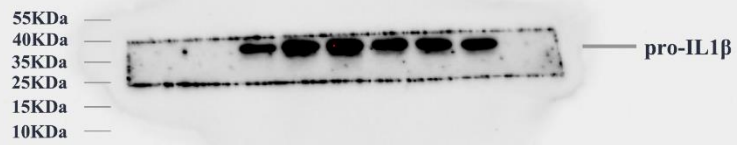

### pro-IL1 $\beta$ in macrophages

Sample order:

C3/ M3/ MC3/ C4/ M4/ MC4

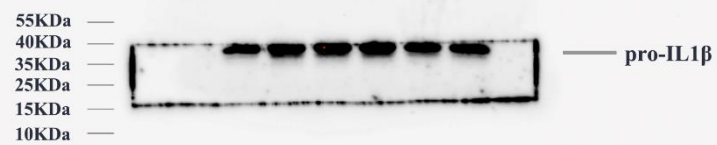

## pro-IL1 $\beta$ in macrophages

Sample order:

C4/ M4/ MC4/ C5/ M5/ MC5

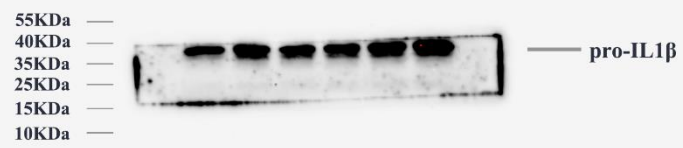

## The protein bands of IL-1 $\beta$ in macrophages

### IL-1 $\beta$ in macrophages

Sample order:

C1/ M1/ MC1/ C2/ M2/ MC2

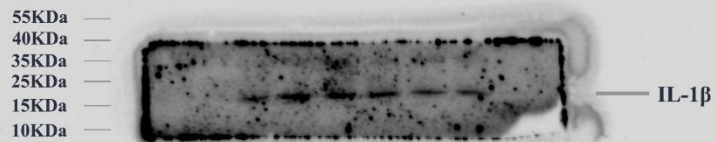

### IL-1 $\beta$ in macrophages

Sample order:

C3/ M3/ MC3/ C4/ M4/ MC4

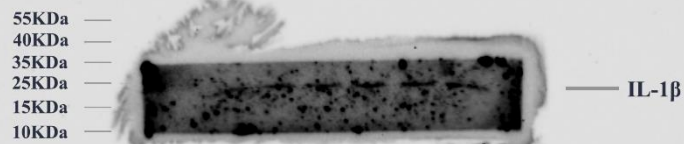

## IL-1 $\beta$ in macrophages

Sample order:

C4/ M4/ MC4/ C5/ M5/ MC5

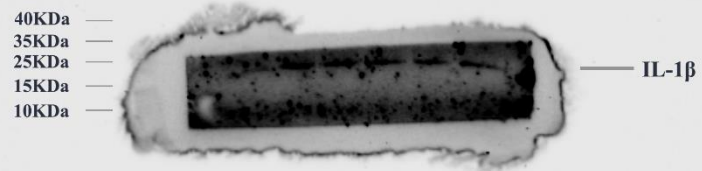

## The protein bands of pro-IL18 and IL-18 in aortas

### pro-IL18 & IL-18 in aortas

Sample order:

none / C1/ M1/ MC1/ none / C2/ M2/ MC2

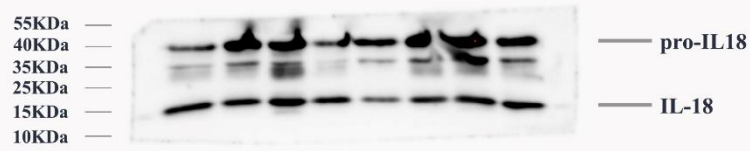

### pro-IL18 & IL-18 in aortas

Sample order:

none / C3/ M3/ MC3/ none / C4/ M4/ MC4

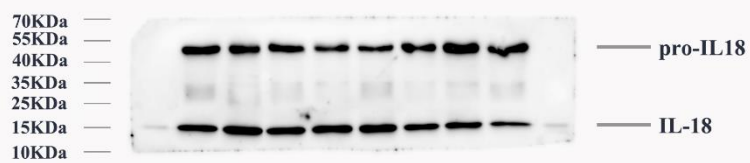



## pro-IL18 & IL-18 in aortas

Sample order:

none / C4/ M4/ MC4/ none / C5/ M5/ MC5

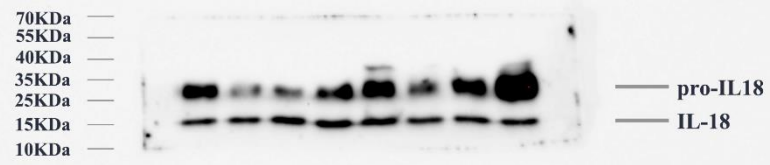

## The protein bands of pro-IL18 in macrophages

### pro-IL18 in macrophages

Sample order:

C1/ M1/ MC1/ C2/ M2/ MC2

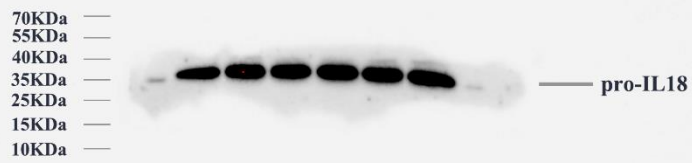

### pro-IL18 in macrophages

Sample order:

C3/ M3/ MC3/ C4/ M4/ MC4

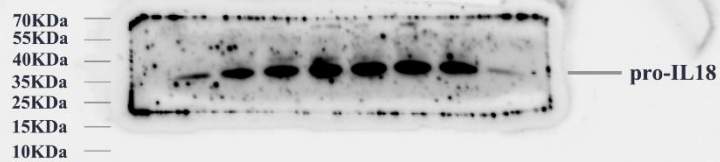

## pro-IL18 in macrophages

Sample order:

C4/ M4/ MC4/ C5/ M5/ MC5

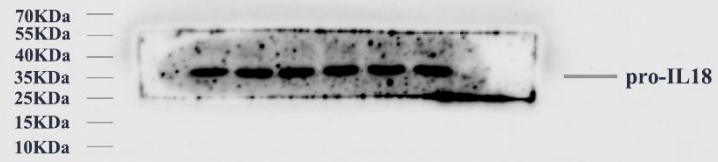

## The protein bands of IL-18 in macrophages

### IL-18 in macrophages

Sample order:

C1/ M1/ MC1/ C2/ M2/ MC2

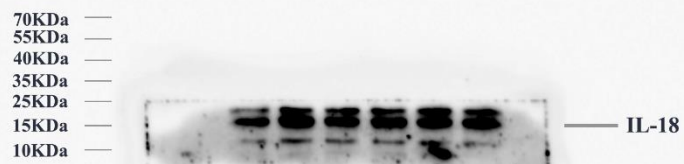

### IL-18 in macrophages

Sample order:

C3/ M3/ MC3/ C4/ M4/ MC4

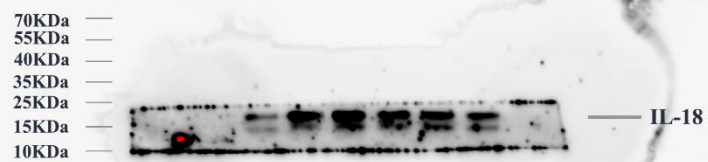

## IL-18 in macrophages

Sample order:

C4/ M4/ MC4/ C5/ M5/ MC5

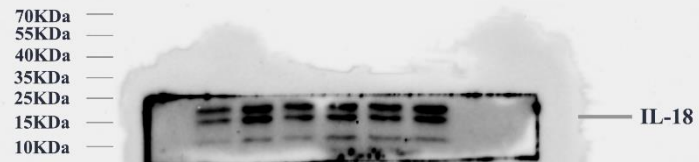

## The protein bands of Full-GSDMD in aortas

### Full-GSDMD in aortas

Sample order:

none/ C1/ M1/ MC1/ none/ C2/ M2/ MC2

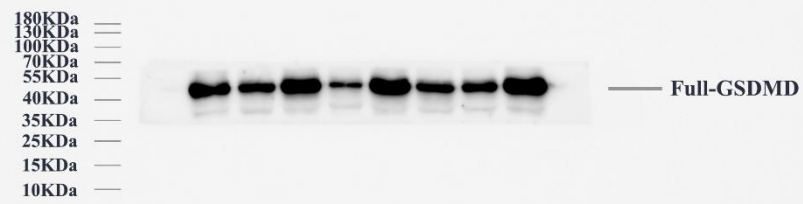

### Full-GSDMD in aortas

Sample order:

none/ C3/ M3/ MC3/ none/ C4/ M4/ MC4

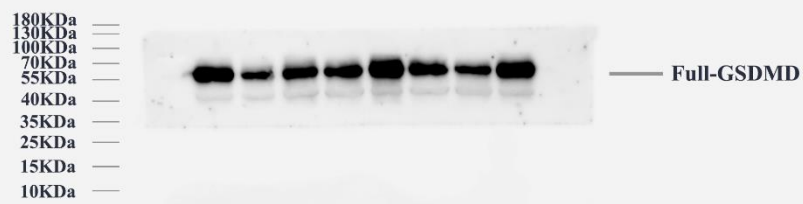

## Full-GSDMD in aortas

Sample order:

none/ C4/ M4/ MC4/ none/ C5/ M5/ MC5

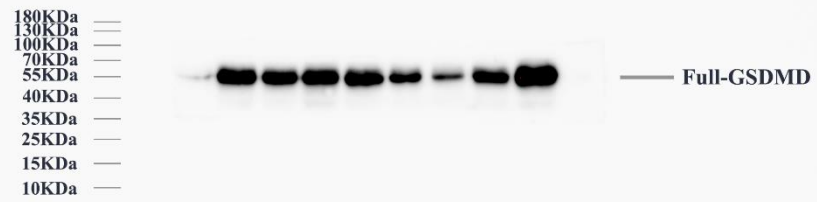

## The protein bands of GSDMD-N in aortas

### GSDMD-N in aortas

Sample order:

none/ C1/ M1/ MC1/ none/ C2/ M2/ MC2

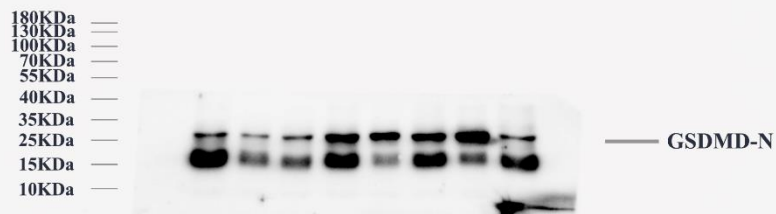

### GSDMD-N in aortas

Sample order:

none/ C3/ M3/ MC3/ none/ C4/ M4/ MC4

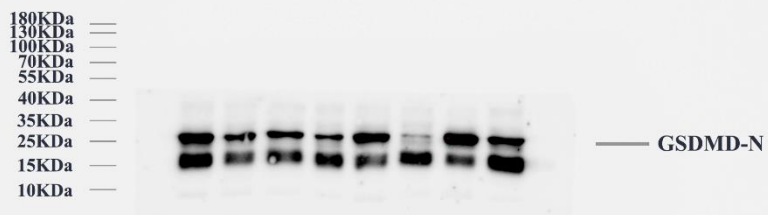





## The protein bands of Full-GSDMD and GSDMD-N in macrophages

### GSDMD in macrophages

Sample order:

C1/ M1/ MC1/ C2/ M2/ MC2/ C3/ M3/ MC3/ C4/ M4/ MC4

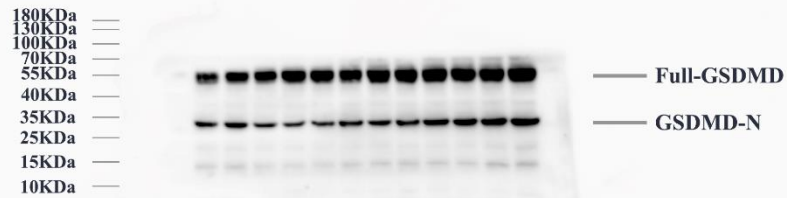

### Full-GSDMD in macrophages

Sample order:

C2/ M2/ MC2/ C3/ M3/ MC3/ C4/ M4/ MC4/ C5/ M5/ MC5

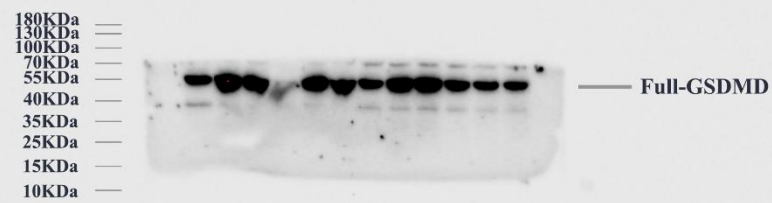

## GSDMD-N in macrophages

Sample order:

C2/ M2/ MC2/ C3/ M3/ MC3/ C4/ M4/ MC4/ C5/ M5/ MC5

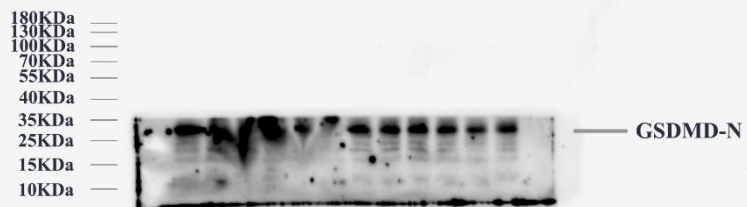

## The protein bands of GAPDH in aortas

### GAPDH in aortas

Sample order:

none/ C1/ M1/ MC1/ none/ C2/ M2/ MC2

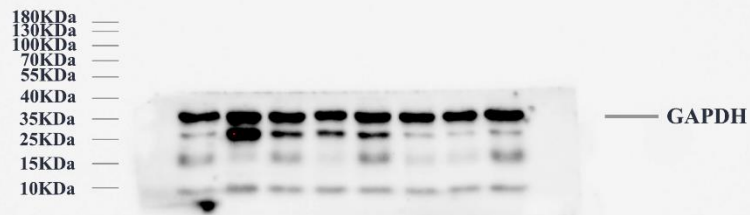

### GAPDH in aortas

Sample order:

none/ C2/ M2/ MC2/ none/ C3/ M3/ MC3

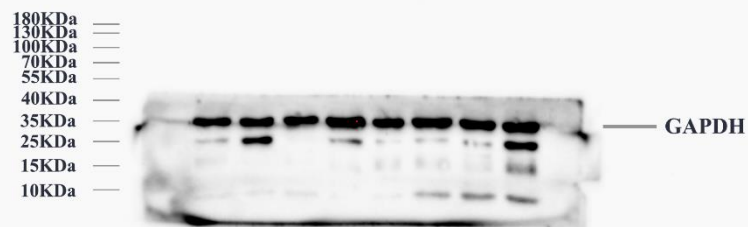

## GAPDH in aortas

Sample order:

none/ C3/ M3/ MC3/ none/ C4/ M4/ MC4

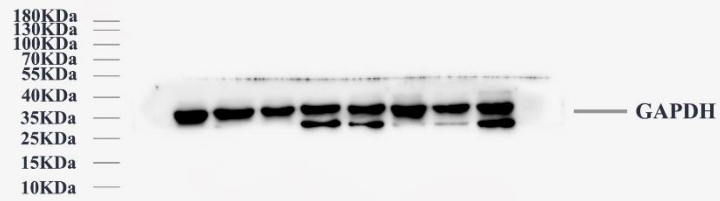

## GAPDH in aortas

Sample order:

none/ C4/ M4/ MC4/ none/ C5/ M5/ MC5

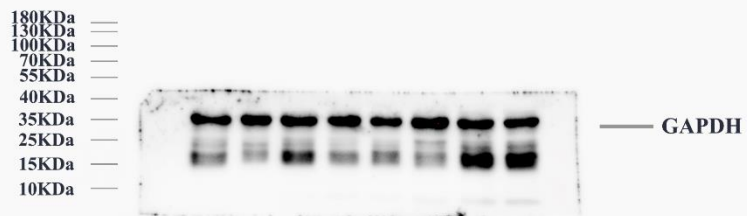

## The protein bands of GAPDH in macrophages

### GAPDH in macrophages

Sample order:

C1/ M1/ MC1/ C2/ M2/ MC2

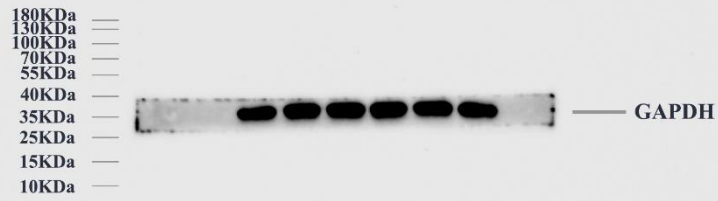

### GAPDH in macrophages

Sample order:

C3/ M3/ MC3/ C4/ M4/ MC4

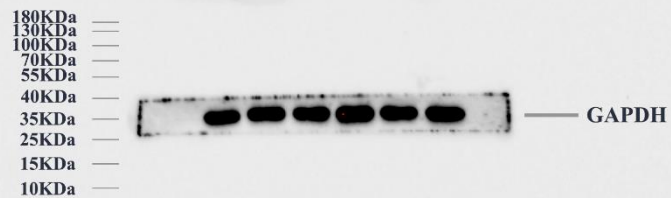

## GAPDH in macrophages

Sample order:

C4/ M4/ MC4/ C5/ M5/ MC5

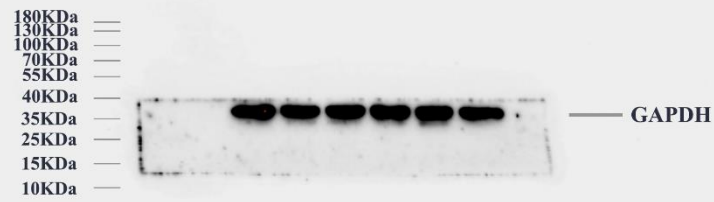

## GAPDH in macrophages

Sample order:

C1/ M1/ MC1/ C2/ M2/ MC2/ C3/ M3/ MC3/ C4/ M4/ MC4

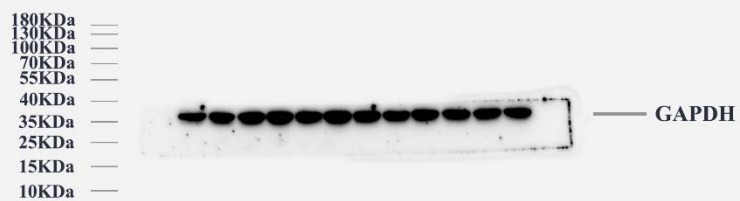

## GAPDH in macrophages

Sample order:

C2/ M2/ MC2/ C3/ M3/ MC3/ C4/ M4/ MC4/ C5/ M5/ MC5

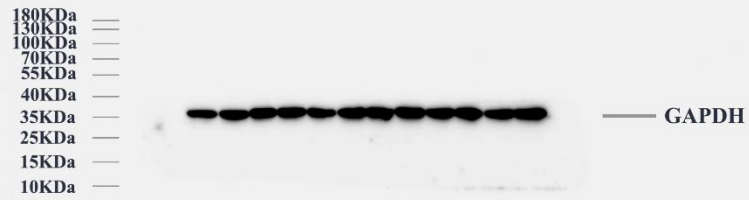

Supplement: 41598_2021_98437_MOESM1_ESM.pdf [file 41598_2021_98437_MOESM1_ESM.pdf]
